# Supplementary material
Source: PubMed Central journal article supplement (PMC5655045)
Supplement: AAC.01342-17_zac011176611s1.pdf [file AAC.01342-17_zac011176611s1.pdf]

## Supplemental Materials

Liu Z, Myers LC. 'Mediator Tail Module is Required for Tac1 Activated *CDR1* Expression and Azole Resistance in *Candida albicans*.'

### Contents:

|                             |           |
|-----------------------------|-----------|
| <b>Fig. S1</b>              | <b>2</b>  |
| <b>Fig. S2</b>              | <b>3</b>  |
| <b>Fig. S3</b>              | <b>4</b>  |
| <b>Fig. S4</b>              | <b>5</b>  |
| <b>Fig. S5</b>              | <b>7</b>  |
| <b>Table S1</b>             | <b>8</b>  |
| <b>Table S2</b>             | <b>9</b>  |
| <b>Table S3</b>             | <b>10</b> |
| <b>Table S4</b>             | <b>11</b> |
| <b>Table S5</b>             | <b>23</b> |
| <b>Table S6</b>             | <b>27</b> |
| <b>Supplemental Methods</b> | <b>32</b> |
| <b>References</b>           | <b>36</b> |

**Fig. S1**

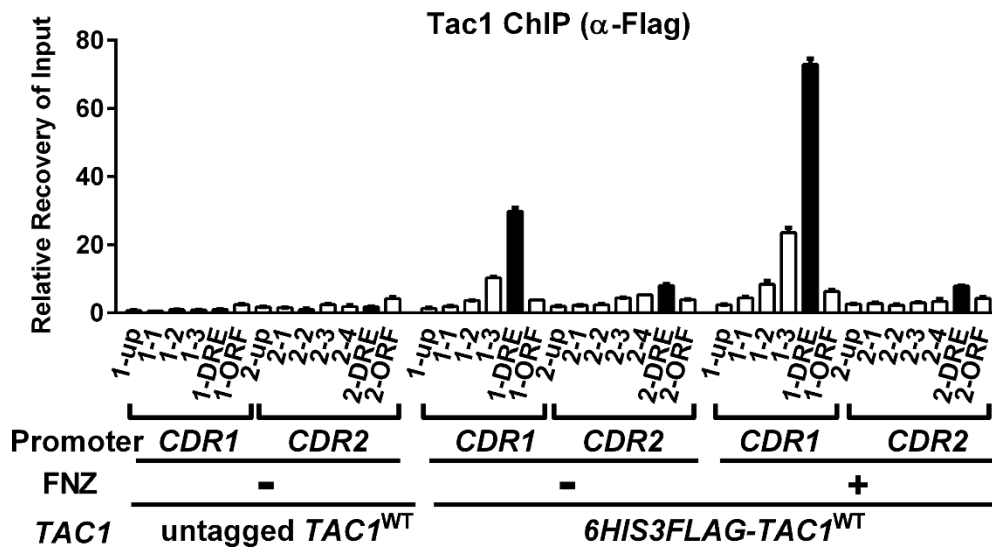

**Fig. S1 Analysis of Tac1 occupancy at the *CDR1* and *CDR2* promoters using additional primer pairs**

Anti-Flag ChIP products obtained from strains expressing 6His3Flag tagged Tac1 (yLM485) or untagged native Tac1 (DSY2937-35), in the absence or presence of fluphenazine (10  $\mu$ g/mL; 15 minutes), were analyzed for Tac1 occupancy profile across the *CDR1* and *CDR2* promoters. Recovery rate (% Input) of DNA fragments containing ‘1-DRE’ amplicon in the ChIP product obtained from uninduced culture of the strain untagged Tac1 (DSY2937-35) was set to ‘1’ to calculate relative recovery at additional regions. Columns representing the recovery at the two DREs were marked black.

**Fig. S2**

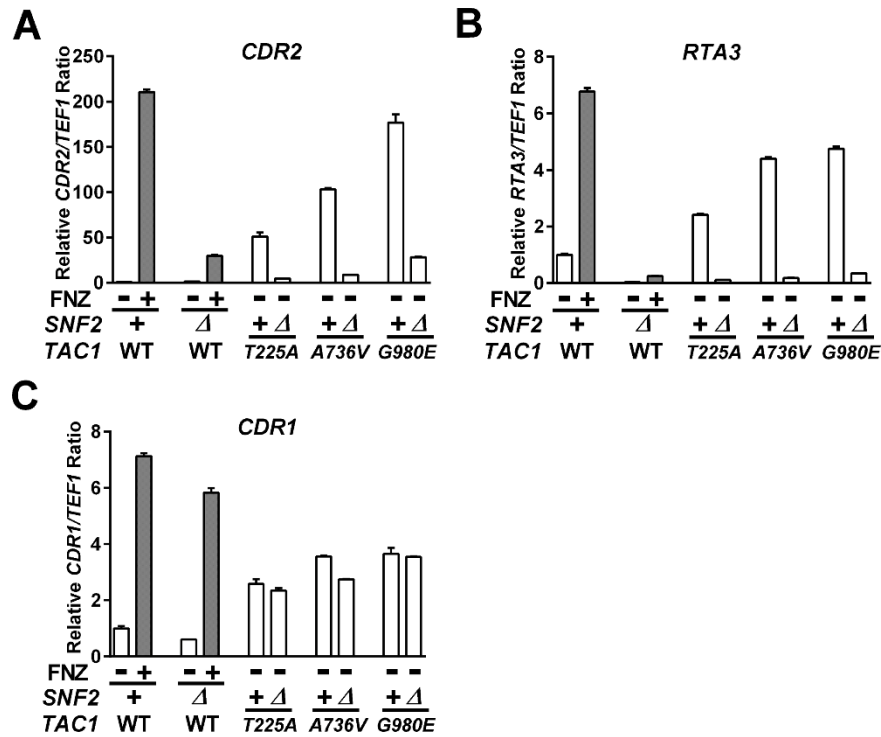

**Fig. S2 Induction of Tac1 target genes in *snf2* deletion strains**

RT-qPCR analysis of *CDR2* (A), *RTA3* (B) and *CDR1* (C) induction in *SNF2*<sup>+/+</sup> ('+') strains bearing individual *TAC1* variants (WT (DSY2937-35), *T225A* (ACY67), *A736V* (ACY13) or *G980E* (ACY71)) and their *snf2* deletion derivatives ('Δ'; yLM472, yLM474, yLM476 and yLM478 respectively) were treated with 10 μg/mL fluphenazine or vehicle for 15 minutes as indicated. *TEF1* abundance was used as internal reference. Basal expression of each gene measured from the untreated *SNF2/TAC1* wild type strain (DSY2937-35) was set to '1' to calculate relative gene expression.

**Fig. S3**

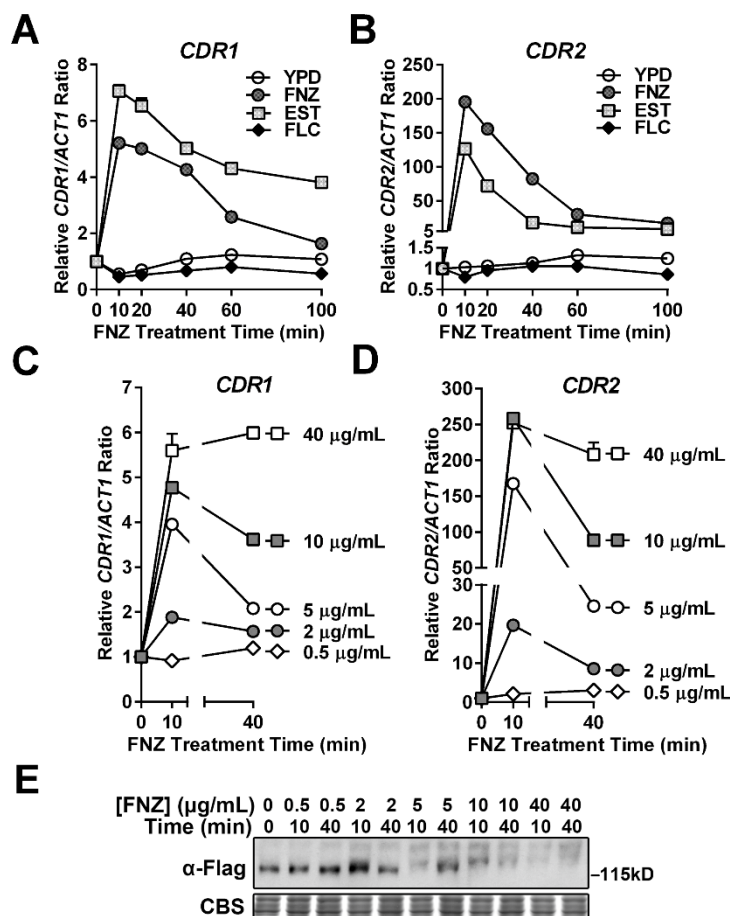

**Fig. S3 Time Course analysis of SDS-PAGE mobility shift and corresponding *CDR1* and *CDR2* expression**

(A-B) RT-qPCR analysis of *CDR1* and *CDR2* expression on RNA extracted from the samples collected in Fig. 8A. Basal expression of each gene, measured before any treatment, was set to '1'. (C) and (D) RT-qPCR analysis of *CDR1* and *CDR2* expression in a 6His3Flag tagged wild type Tac1 expressing strain (yLM485) grown in the presence of differing concentrations of fluphenazine for the indicated period of time. (E) Immunoblot of Tac1 mobility shift in lysates prepared from samples collected for the analysis in (C) and (D). Whole cell lysates were resolved on 6% SDS-PAGE gel and probed with an anti-Flag antibody. Coomassie blue staining (CBS) was used as the loading control.

**Fig. S4**

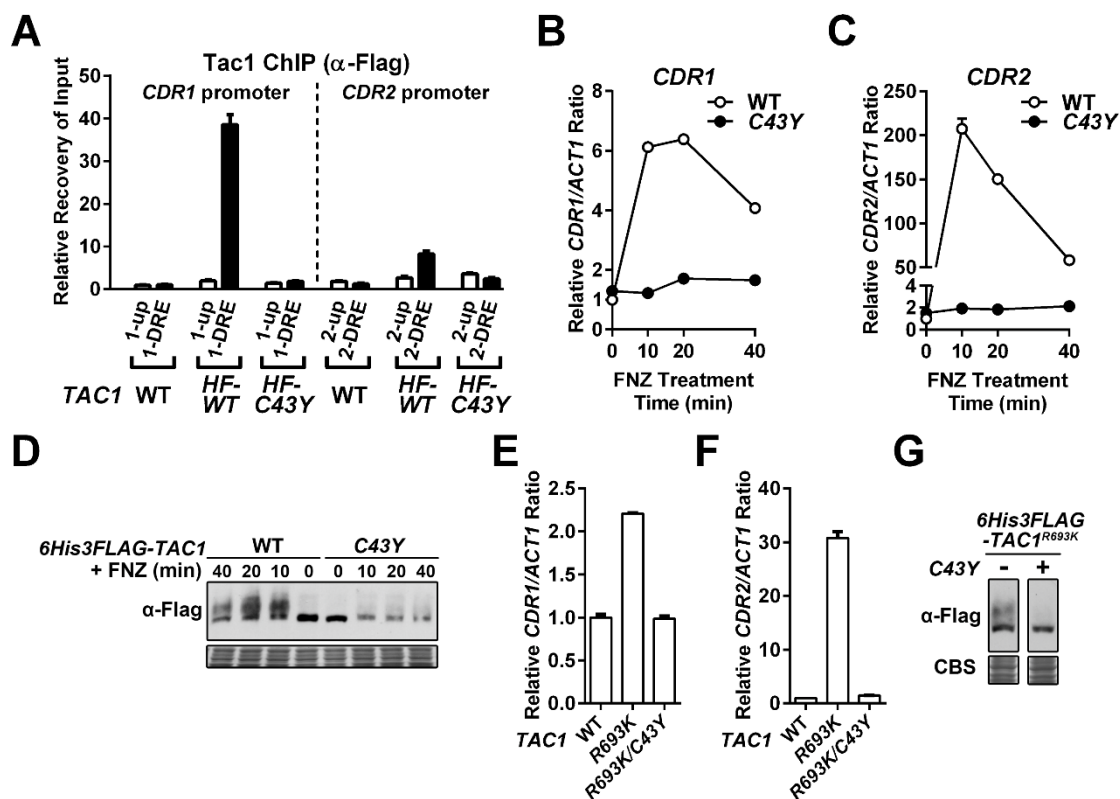

**Fig. S4 A Tac1 C43Y mutant protein is unable to bind DNA, activate transcription of *CDR1* or *CDR2*, or undergo a phosphorylation mobility shift.**

(A) Anti-Flag ChIP analysis of Tac1<sup>C43Y</sup> occupancy at the *CDR1* and *CDR2* promoters in strains expressing 6His3Flag (HF) tagged wild type Tac1 ('*HF-WT*'; yLM485) or Tac1<sup>C43Y</sup> ('*HF-C43Y*'; yLM537). Recovery rate (% Input) of DNA fragments containing the '1-DRE' amplicon in the ChIP product obtained from a strain expressing untagged native Tac1 ('WT'; DSY2937-35) was set to '1' to calculate relative recovery at additional regions. (B-C) RT-qPCR analyses of *CDR1* (B) and *CDR2* (C) expression in strains expressing 6His3Flag tagged wild type Tac1 ('WT'; yLM485) or Tac1<sup>C43Y</sup> ('C43Y'; yLM537) treated with 10  $\mu$ g/mL fluphenazine for the indicated period of time. *CDR1* and *CDR2* expression levels in the 6His3Flag-Tac1<sup>WT</sup> strain (yLM485) were set to '1' individually. (D) Immunoblot analysis of the Tac1<sup>C43Y</sup> phosphorylation shift in the lysates prepared from the samples collected for the analysis in (B) and (C) by using an anti-Flag antibody. The samples were resolved by 6% SDS-PAGE. Coomassie blue staining (CBS) was used as the loading control. (E-F) RT-qPCR analyses of *CDR1* (E) and *CDR2* (F) expression in strains expressing 6His3Flag tagged Tac1<sup>WT</sup> (yLM485), Tac1<sup>R693K</sup> (yLM532) or Tac1<sup>R693K/C43Y</sup> (yLM538). (G) Immunoblot analysis of Tac1 in lysates from strains expressing 6His3Flag tagged Tac1<sup>R693K</sup> (yLM532) or Tac1<sup>R693K/C43Y</sup> (yLM538) using an anti-Flag antibody. Samples were resolved by 6% SDS-PAGE.

Coomassie blue staining (CBS) was used as the loading control. Panels originate from different lanes of the same exposure of the same blot and gel.

**Fig. S5**

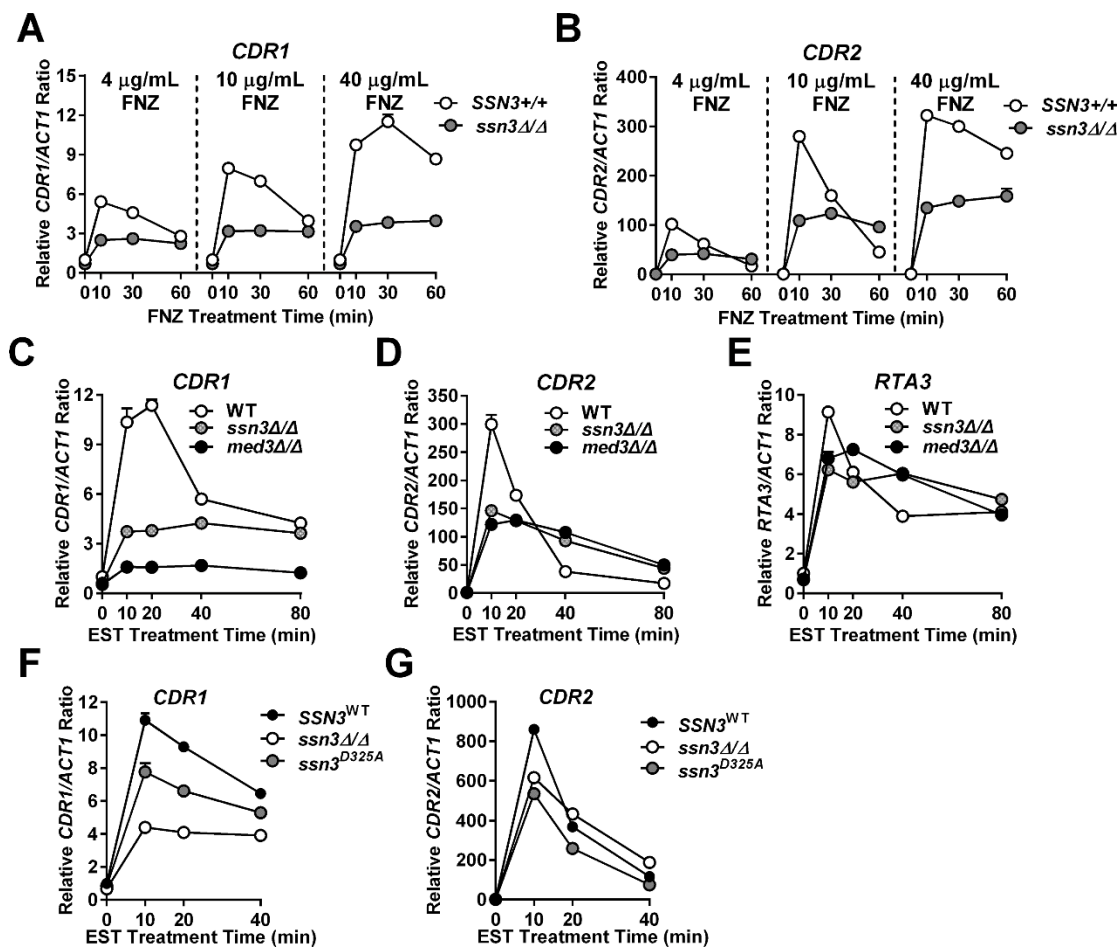

**Fig. S5 Expression of Tac1 target genes, induced by estradiol treatment or different concentration of fluphenazine, in *ssn3* mutant strains**

(A-B) RT-qPCR analyses of *CDR1* (A) and *CDR2* (B) induction in *SSN3*<sup>+/+</sup> and *ssn3* $\Delta/\Delta$  strains expressing wild type Tac1 (DSY2937-35 and yLM236, respectively) by different concentrations of fluphenazine. The expression level of each gene in the untreated *SSN3*<sup>+/+</sup> strain (DSY2937-35) was set to '1'. (C-E) RT-qPCR analysis of *CDR1* (C), *CDR2* (D) and *RTA3* (E) induction in an *ssn3* $\Delta/\Delta$  strain expressing wild type Tac1 (yLM236) by 10  $\mu$ g/mL estradiol (EST). Parallel analysis of estradiol induction in a wild type ('WT'; DSY2937-35) and a *med3* $\Delta/\Delta$  mutant (yLM232) strain are presented for comparison. The expression level of each gene measured in the untreated wild type strain (DSY2937-35) was set to '1'. (F-G) RT-qPCR analysis of estradiol induced *CDR1* (F) and *CDR2* (G) expression in an *ssn3* $\Delta/\Delta$  null strain (yLM265) complemented by either wild type *SSN3*<sup>WT</sup> (yLM279) or a kinase dead allele *SSN3*<sup>D325A</sup> (yLM276). The *CDR1* and *CDR2* expression levels in the *SSN3*<sup>WT</sup> complementary strain culture (yLM279) collected before induction were individually set to '1'.

**Table S1 RT-qPCR analysis of *CDR1* expression activated by *TAC1*<sup>GOF</sup> mutants and xenobiotic exposure in wild type and *med3* deletion strains.**

| <i>TAC1</i><br>allele | Relative <i>CDR1</i> Expression Level <sup>a</sup> (mean ± SD) |            |                 |                             |           |                             |
|-----------------------|----------------------------------------------------------------|------------|-----------------|-----------------------------|-----------|-----------------------------|
|                       | <i>MED3</i> <sup>+/+</sup>                                     |            | <i>med3Δ/Δ</i>  |                             |           |                             |
|                       | YPD                                                            | +FNZ       | YPD             | Fold<br>Change <sup>b</sup> | +FNZ      | Fold<br>Change <sup>c</sup> |
| <i>tac1Δ/Δ</i>        | 1.32±0.01 <sup>d</sup>                                         | 1.55±0.05  | ND <sup>e</sup> | ND                          | ND        | ND                          |
| <b>WT</b>             | 1±0.07                                                         | 7.18±0.12  | 0.59±0.02       | <b>0.59</b>                 | 1.34±0.08 | <b>0.19</b>                 |
| <i>T225A</i>          | 2.91±0.06                                                      | 7.28±0.06  | 1.32±0.03       | <b>0.45</b>                 | 1.29±0.01 | <b>0.18</b>                 |
| <i>A736V</i>          | 4.23±0.12                                                      | 10.52±0.35 | 1.60±0.12       | <b>0.38</b>                 | 1.67±0.01 | <b>0.16</b>                 |
| <i>G980E</i>          | 5.46±0.11                                                      | 10.87±0.07 | 2.05±0.12       | <b>0.38</b>                 | 2.02±0.16 | <b>0.19</b>                 |
| <i>E461K</i>          | 2.32±0.19                                                      | 5.90±0.3   | 1.23±0.04       | <b>0.53</b>                 | 1.07±0.07 | <b>0.18</b>                 |
| <i>ΔM677</i>          | 3.26±0.22                                                      | 6.81±0.05  | 1.21±0.03       | <b>0.37</b>                 | 1.11±0.01 | <b>0.16</b>                 |
| <i>N972D</i>          | 4.54±0.06                                                      | 7.01±0.03  | 1.30±0.11       | <b>0.29</b>                 | 1.05±0.01 | <b>0.15</b>                 |
| <i>Δ962-969</i>       | 3.86±0.07                                                      | 6.94±0.14  | 1.19±0.07       | <b>0.31</b>                 | 1.13±0.03 | <b>0.16</b>                 |
| <i>N977D</i>          | 3.84±0.12                                                      | 6.28±0.07  | 1.38±0.04       | <b>0.36</b>                 | 1.13±0.05 | <b>0.18</b>                 |

<sup>a</sup> The *CDR1*<sup>+/+</sup> *MED3*<sup>+/+</sup> and *CDR1*<sup>+/+</sup> *med3Δ/Δ* strains tested in **Table 1** and a *CDR1*<sup>+/+</sup> *MED3*<sup>+/+</sup> *tac1Δ/Δ* strain (DSY2906), were compared for *CDR1* expression under fluphenazine treated ('+FNZ'; 20 μg/mL for 30 minutes) and non-treated ('YPD') conditions. The *CDR1* level in the non-treated *CDR1*<sup>+/+</sup> *MED3*<sup>+/+</sup> *TAC1*<sup>WT</sup> strain (DSY2937-35) was set to '1'.

<sup>b</sup> *CDR1* mRNA level fold change caused by *med3* deletion under normal growth conditions

<sup>c</sup> *CDR1* mRNA level fold change caused by *med3* deletion under FNZ inducing conditions

<sup>d</sup> Data in *italics* is also shown in a bar graph in **Fig. 1A**.

<sup>e</sup> ND: Not determined



**Table S2. RT-qPCR analysis of *CDR2* expression activated by *TAC1*<sup>GOF</sup> mutants in wild type and *med3* deletion strains**

| <i>TAC1</i><br>allele              | Relative Expression Level of <i>CDR2</i> in YPD medium <sup>a</sup> |                    |             |
|------------------------------------|---------------------------------------------------------------------|--------------------|-------------|
|                                    | <i>MED3</i> <sup>+/+</sup>                                          | <i>med3Δ/Δ</i>     | Fold Change |
| <b>WT</b>                          | <i>1±0.08</i> <sup>b</sup>                                          | 1.61±0.18          | <b>1.61</b> |
| <b><i>T225A</i></b>                | <i>87.32±7.88</i>                                                   | <i>103.83±2.83</i> | <b>1.50</b> |
| <b><i>A736V</i></b>                | <i>155.90±3.03</i>                                                  | <i>135.20±2.12</i> | <b>0.87</b> |
| <b><i>G980E</i></b>                | <i>356.51±2.68</i>                                                  | <i>370.56±21.2</i> | <b>1.04</b> |
| <b>WT<sup>c</sup></b>              | 1±0.04                                                              | 1.30±0.02          | <b>1.30</b> |
| <b><i>E461K</i><sup>c</sup></b>    | 38.61±2.47                                                          | 55.87±1.30         | <b>1.45</b> |
| <b><i>ΔM677</i><sup>c</sup></b>    | 55.81±1.35                                                          | 59.18±2.75         | <b>1.06</b> |
| <b><i>N972D</i><sup>c</sup></b>    | 98.81±0.38                                                          | 95.83±2.16         | <b>0.97</b> |
| <b><i>Δ962-969</i><sup>c</sup></b> | 65.79±0.84                                                          | 68.09±2.48         | <b>1.03</b> |
| <b><i>N977D</i><sup>c</sup></b>    | 97.84±1.83                                                          | 97.62±2.66         | <b>1.00</b> |

<sup>a</sup> The *CDR1*<sup>+/+</sup> *MED3*<sup>+/+</sup> and *CDR1*<sup>+/+</sup> *med3Δ/Δ* strains tested in **Table 1** were compared for *CDR2* expression under normal growth conditions (YPD).

<sup>b</sup> Data in *italics* presents the first group of assays and is also shown in a bar graph form in **Fig. 1C**.

<sup>c</sup> The second group of assays (denoted with a ‘<sup>c</sup>’) were performed separately from the first (data in *italics*). Basal *CDR2* levels measured from the *TAC1*<sup>WT</sup> *MED3*<sup>+/+</sup> strain cultures were individually set to ‘1’ to calculate and compare *CDR2* relative expression between strains within each group.

**Table S3 Fluconazole MIC in *med3Δ/Δ cdr2Δ/Δ* strains bearing *TAC1*<sup>GOF</sup> mutations**

| <i>TAC1</i><br>allele | Fluconazole MIC (μg/mL) <sup>a,b</sup> |                                  |
|-----------------------|----------------------------------------|----------------------------------|
|                       | <i>med3Δ/Δ</i><br><i>CDR2+/+</i>       | <i>med3Δ/Δ</i><br><i>cdr2Δ/Δ</i> |
| WT                    | 0.5-0.75<br>(yLM232)                   | 0.5-0.75<br>(yLM523)             |
| <i>A736V</i>          | 6-8<br>(yLM234)                        | 6-8<br>(yLM525)                  |
| <i>ΔM677</i>          | 4<br>(yLM504)                          | 4<br>(yLM600)                    |
| <i>N972D</i>          | 4<br>(yLM495)                          | 4<br>(yLM527)                    |
| <i>N977D</i>          | 4-6<br>(yLM498)                        | 4-6<br>(yLM529)                  |

<sup>a</sup> Fluconazole MIC was measured by E-test at 30°C on YPD plate. Plates were incubated for 36 hours before read-out. Intermediate values, between scale marks, are presented as intervals.

<sup>b</sup> Exact strain used for each MIC measurement listed in parentheses.

**Table S4 C. albicans strains used in this study**

| <b>Strain Name</b>     | <b>Parental strain</b> | <b>Constructs integrated</b> | <b>Genotype</b>                                                                             | <b>Ref.</b>     |
|------------------------|------------------------|------------------------------|---------------------------------------------------------------------------------------------|-----------------|
| DSY2906<br>(yLM166)    | -                      |                              | <i>tac1-1Δ::hisG/ tac1-2Δ::hisG</i>                                                         | (1)             |
| DSY2937-35<br>(yLM167) | -                      |                              | <i>tac1-1Δ::hisG/ tac1-2Δ::hisG LEU2::TAC1-1/URA3</i>                                       | (2)             |
| yLM208                 | DSY2937-35<br>(yLM167) | <i>pSFS2-MED3KO</i>          | <i>tac1-1Δ::hisG/ tac1-2Δ::hisG LEU2::TAC1-1/URA3<br/>med3Δ::FRT/MED3</i>                   | This study<br># |
| yLM232                 | yLM208                 | <i>pSFS2-MED3KO</i>          | <i>tac1-1Δ::hisG/ tac1-2Δ::hisG LEU2::TAC1-1/URA3<br/>med3Δ::FRT/ med3Δ::FRT</i>            | This study<br># |
| yLM216                 | DSY2937-35<br>(yLM167) | <i>pSFS2- SSN3KO</i>         | <i>tac1-1Δ::hisG/ tac1-2Δ::hisG LEU2::TAC1-1/URA3<br/>ssn3Δ::FRT/SSN3</i>                   | This study      |
| yLM236                 | yLM216                 | <i>pSFS2- SSN3KO</i>         | <i>tac1-1Δ::hisG/ tac1-2Δ::hisG LEU2::TAC1-1/URA3<br/>ssn3Δ::FRT/ssn3Δ::FRT</i>             | This study      |
| yLM225                 | DSY2937-35<br>(yLM167) | <i>pSFS2-MED15KO</i>         | <i>tac1-1Δ::hisG/ tac1-2Δ::hisG LEU2::TAC1-1/URA3<br/>med15Δ::FRT/MED15</i>                 | This study      |
| yLM240                 | yLM225                 | <i>pSFS2-MED15KO</i>         | <i>tac1-1Δ::hisG/ tac1-2Δ::hisG LEU2::TAC1-1/URA3<br/>med15Δ::FRT/med15Δ::FRT</i>           | This study      |
| ACY67<br>(yLM168)      | -                      |                              | <i>tac1-1Δ::hisG/ tac1-2Δ::hisG<br/>LEU2::TAC1-1-T225A/URA3</i>                             | (3)             |
| yLM210                 | ACY67<br>(yLM168)      | <i>pSFS2-MED3KO</i>          | <i>tac1-1Δ::hisG/ tac1-2Δ::hisG<br/>LEU2::TAC1-1-T225A/URA3 med3Δ::FRT/MED3</i>             | This study      |
| yLM233                 | yLM210                 | <i>pSFS2-MED3KO</i>          | <i>tac1-1Δ::hisG/ tac1-2Δ::hisG<br/>LEU2::TAC1-1-T225A/URA3 med3Δ::FRT/<br/>med3Δ::FRT</i>  | This study      |
| yLM218                 | ACY67<br>(yLM168)      | <i>pSFS2- SSN3KO</i>         | <i>tac1-1Δ::hisG/ tac1-2Δ::hisG<br/>LEU2::TAC1-1-T225A/URA3 ssn3Δ::FRT/SSN3</i>             | This study      |
| yLM237                 | yLM218                 | <i>pSFS2- SSN3KO</i>         | <i>tac1-1Δ::hisG/ tac1-2Δ::hisG<br/>LEU2::TAC1-1-T225A/URA3<br/>ssn3Δ::FRT/ssn3Δ::FRT</i>   | This study      |
| yLM226                 | ACY67<br>(yLM168)      | <i>pSFS2-MED15KO</i>         | <i>tac1-1Δ::hisG/ tac1-2Δ::hisG<br/>LEU2::TAC1-1-T225A/URA3<br/>med15Δ::FRT/MED15</i>       | This study      |
| yLM241                 | yLM226                 | <i>pSFS2-MED15KO</i>         | <i>tac1-1Δ::hisG/ tac1-2Δ::hisG<br/>LEU2::TAC1-1-T225A/URA3<br/>med15Δ::FRT/med15Δ::FRT</i> | This study      |
| ACY13<br>(yLM169)      | -                      |                              | <i>tac1-1Δ::hisG/ tac1-2Δ::hisG<br/>LEU2::TAC1-1-A736V/URA3</i>                             | (3)             |
| yLM212                 | ACY13<br>(yLM169)      | <i>pSFS2-MED3KO</i>          | <i>tac1-1Δ::hisG/ tac1-2Δ::hisG<br/>LEU2::TAC1-1-A736V/URA3 med3Δ::FRT/MED3</i>             | This study      |
| yLM234                 | yLM212                 | <i>pSFS2-MED3KO</i>          | <i>tac1-1Δ::hisG/ tac1-2Δ::hisG</i>                                                         | This study      |

|                   |                     |                       |                                                                                             |            |
|-------------------|---------------------|-----------------------|---------------------------------------------------------------------------------------------|------------|
|                   |                     |                       | <i>LEU2::TAC1-1-A736V/URA3 med3Δ::FRT/<br/>med3Δ::FRT</i>                                   |            |
| yLM220            | ACY13<br>(yLM169)   | <i>pSFS2-SSN3KO</i>   | <i>tac1-1Δ::hisG/ tac1-2Δ::hisG<br/>LEU2::TAC1-1-A736V/URA3 ssn3Δ::FRT/SSN3</i>             | This study |
| yLM238            | yLM220              | <i>pSFS2-SSN3KO</i>   | <i>tac1-1Δ::hisG/ tac1-2Δ::hisG<br/>LEU2::TAC1-1-A736V/URA3<br/>ssn3Δ::FRT/ssn3Δ::FRT</i>   | This study |
| yLM229            | ACY13<br>(yLM169)   | <i>pSFS2-MED15KO</i>  | <i>tac1-1Δ::hisG/ tac1-2Δ::hisG<br/>LEU2::TAC1-1-A736V/URA3<br/>med15Δ::FRT/MED15</i>       | This study |
| yLM242            | yLM229              | <i>pSFS2-MED15KO</i>  | <i>tac1-1Δ::hisG/ tac1-2Δ::hisG<br/>LEU2::TAC1-1-A736V/URA3<br/>med15Δ::FRT/med15Δ::FRT</i> | This study |
| ACY71<br>(yLM170) | -                   |                       | <i>tac1-1Δ::hisG/ tac1-2Δ::hisG<br/>LEU2::TAC1-1-G980E/URA3</i>                             | (3)        |
| yLM214            | ACY71<br>(yLM170)   | <i>pSFS2-MED3KO</i>   | <i>tac1-1Δ::hisG/ tac1-2Δ::hisG<br/>LEU2::TAC1-1-G980E/URA3 med3Δ::FRT/MED3</i>             | This study |
| yLM235            | yLM214              | <i>pSFS2-MED3KO</i>   | <i>tac1-1Δ::hisG/ tac1-2Δ::hisG<br/>LEU2::TAC1-1-G980E/URA3 med3Δ::FRT/<br/>med3Δ::FRT</i>  | This study |
| yLM222            | ACY71<br>(yLM170)   | <i>pSFS2-SSN3KO</i>   | <i>tac1-1Δ::hisG/ tac1-2Δ::hisG<br/>LEU2::TAC1-1-G980E/URA3 ssn3Δ::FRT/SSN3</i>             | This study |
| yLM239            | yLM222              | <i>pSFS2-SSN3KO</i>   | <i>tac1-1Δ::hisG/ tac1-2Δ::hisG<br/>LEU2::TAC1-1-G980E/URA3<br/>ssn3Δ::FRT/ssn3Δ::FRT</i>   | This study |
| yLM230            | ACY71<br>(yLM170)   | <i>pSFS2-MED15KO</i>  | <i>tac1-1Δ::hisG/ tac1-2Δ::hisG<br/>LEU2::TAC1-1-G980E/URA3<br/>med15Δ::FRT/MED15</i>       | This study |
| yLM243            | yLM230              | <i>pSFS2-MED15KO</i>  | <i>tac1-1Δ::hisG/ tac1-2Δ::hisG<br/>LEU2::TAC1-1-G980E/URA3<br/>med15Δ::FRT/med15Δ::FRT</i> | This study |
| yLM490            | DSY2906<br>(yLM166) | <i>TAC1Inte E461K</i> | <i>tac1-1Δ::hisG/ tac1-2Δ::hisG<br/>LEU2::TAC1-1-E461K/URA3</i>                             | This study |
| yLM491            | yLM490              | <i>pSFS2-MED3KO</i>   | <i>tac1-1Δ::hisG/ tac1-2Δ::hisG<br/>LEU2::TAC1-1-E461K/URA3 med3Δ::FRT/MED3</i>             | This study |
| yLM492            | yLM491              | <i>pSFS2-MED3KO</i>   | <i>tac1-1Δ::hisG/ tac1-2Δ::hisG<br/>LEU2::TAC1-1-E461K/URA3<br/>med3Δ::FRT/med3Δ::FRT</i>   | This study |
| yLM493            | DSY2906<br>(yLM166) | <i>TAC1Inte N972D</i> | <i>tac1-1Δ::hisG/ tac1-2Δ::hisG<br/>LEU2::TAC1-1-N972D/URA3</i>                             | This study |
| yLM494            | yLM493              | <i>pSFS2-MED3KO</i>   | <i>tac1-1Δ::hisG/ tac1-2Δ::hisG<br/>LEU2::TAC1-1-N972D/URA3 med3Δ::FRT/MED3</i>             | This study |
| yLM495            | yLM494              | <i>pSFS2-MED3KO</i>   | <i>tac1-1Δ::hisG/ tac1-2Δ::hisG<br/>LEU2::TAC1-1-N972D/URA3</i>                             | This study |

|        |                        |                                    |                                                                                                                            |            |
|--------|------------------------|------------------------------------|----------------------------------------------------------------------------------------------------------------------------|------------|
|        |                        |                                    | <i>med3Δ::FRT/med3Δ::FRT</i>                                                                                               |            |
| yLM496 | DSY2906<br>(yLM166)    | <i>TAC1Inte N977D</i>              | <i>tac1-1Δ::hisG/ tac1-2Δ::hisG</i><br><i>LEU2::TAC1-1-N977D/URA3</i>                                                      | This study |
| yLM497 | yLM496                 | <i>pSFS2-MED3KO</i>                | <i>tac1-1Δ::hisG/ tac1-2Δ::hisG</i><br><i>LEU2::TAC1-1-N977D/URA3 med3Δ::FRT/MED3</i>                                      | This study |
| yLM498 | yLM497                 | <i>pSFS2-MED3KO</i>                | <i>tac1-1Δ::hisG/ tac1-2Δ::hisG</i><br><i>LEU2::TAC1-1-N977D/URA3</i><br><i>med3Δ::FRT/med3Δ::FRT</i>                      | This study |
| yLM499 | DSY2906<br>(yLM166)    | <i>TAC1Inte</i><br><i>Δ962-969</i> | <i>tac1-1Δ::hisG/ tac1-2Δ::hisG</i><br><i>LEU2::TAC1-1-Δ962-969/URA3</i>                                                   | This study |
| yLM500 | yLM499                 | <i>pSFS2-MED3KO</i>                | <i>tac1-1Δ::hisG/ tac1-2Δ::hisG</i><br><i>LEU2::TAC1-1-Δ962-969/URA3</i><br><i>med3Δ::FRT/MED3</i>                         | This study |
| yLM501 | yLM500                 | <i>pSFS2-MED3KO</i>                | <i>tac1-1Δ::hisG/ tac1-2Δ::hisG</i><br><i>LEU2::TAC1-1-Δ962-969/URA3</i><br><i>med3Δ::FRT/med3Δ::FRT</i>                   | This study |
| yLM502 | DSY2906<br>(yLM166)    | <i>TAC1Inte ΔM677</i>              | <i>tac1-1Δ::hisG/ tac1-2Δ::hisG</i><br><i>LEU2::TAC1-1-ΔM677/URA3</i>                                                      | This study |
| yLM503 | yLM502                 | <i>pSFS2-MED3KO</i>                | <i>tac1-1Δ::hisG/ tac1-2Δ::hisG</i><br><i>LEU2::TAC1-1-ΔM677/URA3 med3Δ::FRT/MED3</i>                                      | This study |
| yLM504 | yLM503                 | <i>pSFS2-MED3KO</i>                | <i>tac1-1Δ::hisG/ tac1-2Δ::hisG</i><br><i>LEU2::TAC1-1-ΔM677/URA3</i><br><i>med3Δ::FRT/med3Δ::FRT</i>                      | This study |
| yLM505 | DSY2937-35<br>(yLM167) |                                    | <i>tac1-1Δ::hisG/ tac1-2Δ::hisG LEU2::TAC1-1/URA3</i><br><i>CDR1::CDR1-3HA/CDR1</i>                                        | This study |
| yLM506 | yLM232                 |                                    | <i>tac1-1Δ::hisG/ tac1-2Δ::hisG LEU2::TAC1-1/URA3</i><br><i>med3Δ::FRT/ med3Δ::FRT</i><br><i>CDR1::CDR1-3HA/CDR1</i>       | This study |
| yLM507 | ACY67<br>(yLM168)      |                                    | <i>tac1-1Δ::hisG/ tac1-2Δ::hisG</i><br><i>LEU2::TAC1-1-T225A/URA3</i><br><i>CDR1::CDR1-3HA/CDR1</i>                        | This study |
| yLM508 | yLM233                 |                                    | <i>tac1-1Δ::hisG/ tac1-2Δ::hisG</i><br><i>LEU2::TAC1-1-T225A/URA3 med3Δ::FRT/</i><br><i>med3Δ::FRT CDR1::CDR1-3HA/CDR1</i> | This study |
| yLM509 | ACY13<br>(yLM169)      |                                    | <i>tac1-1Δ::hisG/ tac1-2Δ::hisG</i><br><i>LEU2::TAC1-1-A736V/URA3</i><br><i>CDR1::CDR1-3HA/CDR1</i>                        | This study |
| yLM510 | yLM234                 |                                    | <i>tac1-1Δ::hisG/ tac1-2Δ::hisG</i><br><i>LEU2::TAC1-1-A736V/URA3 med3Δ::FRT/</i><br><i>med3Δ::FRT CDR1::CDR1-3HA/CDR1</i> | This study |
| yLM511 | ACY71<br>(yLM170)      |                                    | <i>tac1-1Δ::hisG/ tac1-2Δ::hisG</i><br><i>LEU2::TAC1-1-G980E/URA3</i><br><i>CDR1::CDR1-3HA/CDR1</i>                        | This study |
| yLM512 | yLM235                 |                                    | <i>tac1-1Δ::hisG/ tac1-2Δ::hisG</i>                                                                                        | This study |

|        |        |                                      |                                                                                                                      |            |
|--------|--------|--------------------------------------|----------------------------------------------------------------------------------------------------------------------|------------|
|        |        |                                      | <i>LEU2::TAC1-1-G980E/URA3 med3Δ::FRT/<br/>med3Δ::FRT CDR1::CDR1-3HA/CDR1</i>                                        |            |
| yLM513 | yLM502 |                                      | <i>tac1-1Δ::hisG/ tac1-2Δ::hisG<br/>LEU2::TAC1-1-AM677/URA3<br/>CDR1::CDR1-3HA/CDR1</i>                              | This study |
| yLM514 | yLM490 |                                      | <i>tac1-1Δ::hisG/ tac1-2Δ::hisG<br/>LEU2::TAC1-1-E461K/URA3<br/>CDR1::CDR1-3HA/CDR1</i>                              | This study |
| yLM515 | yLM492 |                                      | <i>tac1-1Δ::hisG/ tac1-2Δ::hisG<br/>LEU2::TAC1-1-E461K/URA3<br/>med3Δ::FRT/med3Δ::FRT<br/>CDR1::CDR1-3HA/CDR1</i>    | This study |
| yLM516 | yLM493 |                                      | <i>tac1-1Δ::hisG/ tac1-2Δ::hisG<br/>LEU2::TAC1-1-N972D/URA3<br/>CDR1::CDR1-3HA/CDR1</i>                              | This study |
| yLM517 | yLM495 |                                      | <i>tac1-1Δ::hisG/ tac1-2Δ::hisG<br/>LEU2::TAC1-1-N972D/URA3<br/>med3Δ::FRT/med3Δ::FRT<br/>CDR1::CDR1-3HA/CDR1</i>    | This study |
| yLM518 | yLM496 |                                      | <i>tac1-1Δ::hisG/ tac1-2Δ::hisG<br/>LEU2::TAC1-1-N977D/URA3<br/>CDR1::CDR1-3HA/CDR1</i>                              | This study |
| yLM519 | yLM498 |                                      | <i>tac1-1Δ::hisG/ tac1-2Δ::hisG<br/>LEU2::TAC1-1-N977D/URA3<br/>med3Δ::FRT/med3Δ::FRT<br/>CDR1::CDR1-3HA/CDR1</i>    | This study |
| yLM520 | yLM499 |                                      | <i>tac1-1Δ::hisG/ tac1-2Δ::hisG<br/>LEU2::TAC1-1-A962-969/URA3<br/>CDR1::CDR1-3HA/CDR1</i>                           | This study |
| yLM521 | yLM501 |                                      | <i>tac1-1Δ::hisG/ tac1-2Δ::hisG<br/>LEU2::TAC1-1-A962-969/URA3<br/>med3Δ::FRT/med3Δ::FRT<br/>CDR1::CDR1-3HA/CDR1</i> | This study |
| yLM522 | yLM208 | <i>pSFS2-CDR2KO<br/>(two rounds)</i> | <i>tac1-1Δ::hisG/ tac1-2Δ::hisG LEU2::TAC1-1/URA3<br/>med3Δ::FRT/MED3 cdr2Δ::FRT/ cdr2Δ::FRT</i>                     | This study |
| yLM523 | yLM522 | <i>pSFS2-MED3KO</i>                  | <i>tac1-1Δ::hisG/ tac1-2Δ::hisG LEU2::TAC1-1/URA3<br/>med3Δ::FRT/med3Δ::FRT<br/>cdr2Δ::FRT/cdr2Δ::FRT</i>            | This study |
| yLM524 | yLM212 | <i>pSFS2-CDR2KO<br/>(two rounds)</i> | <i>tac1-1Δ::hisG/ tac1-2Δ::hisG<br/>LEU2::TAC1-1-A736V/URA3 med3Δ::FRT/MED3<br/>cdr2Δ::FRT/ cdr2Δ::FRT</i>           | This study |
| yLM525 | yLM524 | <i>pSFS2-MED3KO</i>                  | <i>tac1-1Δ::hisG/ tac1-2Δ::hisG<br/>LEU2::TAC1-1-A736V/URA3<br/>med3Δ::FRT/med3Δ::FRT</i>                            | This study |

|                  |                     |                                            |                                                                                                                                                     |                 |
|------------------|---------------------|--------------------------------------------|-----------------------------------------------------------------------------------------------------------------------------------------------------|-----------------|
|                  |                     |                                            | <b><i>cdr2A::FRT/cdr2A::FRT</i></b>                                                                                                                 |                 |
| yLM526           | yLM494              | <i>pSFS2-CDR2KO</i><br><b>(two rounds)</b> | <i>tac1-1Δ::hisG/ tac1-2Δ::hisG</i><br><i>LEU2::TAC1-1-N972D/URA3</i><br><b><i>med3Δ::FRT/MED3 cdr2A::FRT/cdr2A::FRT</i></b>                        | This study      |
| yLM527           | yLM526              | <i>pSFS2-MED3KO</i>                        | <i>tac1-1Δ::hisG/ tac1-2Δ::hisG</i><br><i>LEU2::TAC1-1-N972D/URA3</i><br><b><i>med3A::FRT/med3A::FRT</i></b><br><b><i>cdr2A::FRT/cdr2A::FRT</i></b> | This study      |
| yLM528           | yLM497              | <i>pSFS2-CDR2KO</i><br><b>(two rounds)</b> | <i>tac1-1Δ::hisG/ tac1-2Δ::hisG</i><br><i>LEU2::TAC1-1-N977D/URA3</i><br><b><i>med3Δ::FRT/MED3 cdr2A::FRT/cdr2A::FRT</i></b>                        | This study      |
| yLM529           | yLM528              | <i>pSFS2-MED3KO</i>                        | <i>tac1-1Δ::hisG/ tac1-2Δ::hisG</i><br><i>LEU2::TAC1-1-N977D/URA3</i><br><b><i>med3A::FRT/med3A::FRT</i></b><br><b><i>cdr2A::FRT/cdr2A::FRT</i></b> | This study      |
| SN152<br>(AZC22) |                     |                                            | <i>arg4/arg4 leu2/leu2 his1 /his1 URA3/ura3 ::imm434</i><br><i>IRO1/iro1 ::imm434</i>                                                               | (4)             |
| AZC32            |                     |                                            | <i>arg4/arg4 leu2/leu2 his1 /his1 URA3/ura3::imm434</i><br><i>IRO1/iro1::imm434 med5Δ::HIS1/med5Δ::LEU2</i>                                         | (5)             |
| AZC34            |                     |                                            | <i>arg4/arg4 leu2/leu2 his1 /his1 URA3/ura3::imm434</i><br><i>IRO1/iro1::imm434 med16Δ::HIS1/med16Δ::LEU2</i>                                       | (5)             |
| AZC42            |                     |                                            | <i>arg4/arg4 leu2/leu2 his1 /his1 URA3/ura3::imm434</i><br><i>IRO1/iro1::imm434 med9Δ::HIS1/med9Δ::LEU2</i>                                         | (5)             |
| AZC44            |                     |                                            | <i>arg4/arg4 leu2/leu2 his1 /his1 URA3/ura3::imm434</i><br><i>IRO1/iro1::imm434 med20Δ::HIS1/med20Δ::LEU2</i>                                       | (5)             |
| AZC46            |                     |                                            | <i>arg4/arg4 leu2/leu2 his1 /his1 URA3/ura3::imm434</i><br><i>IRO1/iro1::imm434 med1Δ::HIS1/med1Δ::LEU2</i>                                         | (5)             |
| AZC51<br>(yLM95) |                     |                                            | <i>arg4/arg4 leu2/leu2 his1 /his1 URA3/ura3::imm434</i><br><i>IRO1/iro1::imm434 med3Δ::HIS1/med3Δ::LEU2</i>                                         | (6)             |
| cTTR01           |                     |                                            | <i>arg4/arg4 leu2/leu2 his1 /his1 URA3/ura3::imm434</i><br><i>IRO1/iro1::imm434 med15Δ::HIS1/med15Δ::LEU2</i>                                       | (5)             |
| AZC52            |                     |                                            | <i>arg4/arg4 leu2/leu2 his1 /his1 URA3/ura3::imm434</i><br><i>IRO1/iro1::imm434 med12Δ::HIS1/med12Δ::LEU2</i>                                       | (5)             |
| yLM485           | DSY2906<br>(yLM166) | <i>TAC1InteHF-WT</i>                       | <i>tac1-1Δ::hisG/ tac1-2Δ::hisG</i><br><i>LEU2::P<sub>TAC1</sub>-6HIS3FLAG-TAC1-1/URA3</i>                                                          | This study<br># |
| yLM530           | DSY2906<br>(yLM166) | <i>TAC1InteHF-<br/>WT<sub>OE</sub></i>     | <i>tac1-1Δ::hisG/ tac1-2Δ::hisG</i><br><i>LEU2::P<sub>ACT1</sub>-6HIS3FLAG-TAC1-1/URA3</i>                                                          | This study      |
| yLM531           | DSY2906<br>(yLM166) | <i>TAC1InteHF-A73<br/>6V</i>               | <i>tac1-1Δ::hisG/ tac1-2Δ::hisG</i><br><i>LEU2::P<sub>TAC1</sub>-6HIS3FLAG-TAC1-1-A736V/URA3</i>                                                    | This study      |
| yLM532           | DSY2906<br>(yLM166) | <i>TAC1InteHF-R69<br/>3K</i>               | <i>tac1-1Δ::hisG/ tac1-2Δ::hisG</i><br><i>LEU2::P<sub>TAC1</sub>-6HIS3FLAG-TAC1-1-R693K/URA3</i>                                                    | This study      |
| yLM533           | DSY2906<br>(yLM166) | <i>TAC1InteHF-ΔM6<br/>77</i>               | <i>tac1-1Δ::hisG/ tac1-2Δ::hisG</i><br><i>LEU2::P<sub>TAC1</sub>-6HIS3FLAG-TAC1-1-ΔM677/URA3</i>                                                    | This study      |

|         |                     |                                           |                                                                                                                                  |            |
|---------|---------------------|-------------------------------------------|----------------------------------------------------------------------------------------------------------------------------------|------------|
| yLM534  | DSY2906<br>(yLM166) | <i>TAC1InteHF-N97</i><br>2D               | <i>tac1-1Δ::hisG/ tac1-2Δ::hisG</i><br><i>LEU2::P<sub>TAC1</sub>-6HIS3FLAG-TAC1-1-N972D/URA3</i>                                 | This study |
| yLM535  | DSY2906<br>(yLM166) | <i>TAC1InteHF-Δ96</i><br>2-969            | <i>tac1-1Δ::hisG/ tac1-2Δ::hisG</i><br><i>LEU2::P<sub>TAC1</sub>-6HIS3FLAG-TAC1-1-Δ962-969/URA3</i>                              | This study |
| yLM536* | DSY2906<br>(yLM166) | <i>TAC1InteHF-N97</i><br>7D               | <i>tac1-1Δ::hisG/ tac1-2Δ::hisG</i><br><i>LEU2::P<sub>TAC1</sub>-6HIS3FLAG-TAC1-1-N977D/URA3</i>                                 | This study |
| yLM537  | DSY2906<br>(yLM166) | <i>TAC1InteHF-C43</i><br>Y                | <i>tac1-1Δ::hisG/ tac1-2Δ::hisG</i><br><i>LEU2::P<sub>TAC1</sub>-6HIS3FLAG-TAC1-1-C43Y/URA3</i>                                  | This study |
| yLM538  | DSY2906<br>(yLM166) | <i>TAC1InteHF-R69</i><br>3K/C43Y          | <i>tac1-1Δ::hisG/ tac1-2Δ::hisG</i><br><i>LEU2::P<sub>TAC1</sub>-6HIS3FLAG-TAC1-1-R693K-C43Y/URA3</i>                            | This study |
| yLM539  | DSY2906<br>(yLM166) | <i>TAC1InteHF-TAC1</i><br>ΔTAD            | <i>tac1-1Δ::hisG/ tac1-2Δ::hisG</i><br><i>LEU2::P<sub>TAC1</sub>-6HIS3FLAG-TAC1-1-ΔTAD(aa1-845)/URA3</i>                         | This study |
| yLM540  | DSY2906<br>(yLM166) | <i>TAC1InteHF-R69</i><br>3K <sub>OE</sub> | <i>tac1-1Δ::hisG/ tac1-2Δ::hisG</i><br><i>LEU2::P<sub>ACT1</sub>-6HIS3FLAG-TAC1-1-R693K/URA3</i>                                 | This study |
| yLM541  | DSY2906<br>(yLM166) | <i>TAC1InteHF-N97</i><br>2D <sub>OE</sub> | <i>tac1-1Δ::hisG/ tac1-2Δ::hisG</i><br><i>LEU2::P<sub>ACT1</sub>-6HIS3FLAG-TAC1-1-N972D/URA3</i>                                 | This study |
| yLM542  | DSY2906<br>(yLM166) | <i>pSFS2-MED3KO</i>                       | <i>tac1-1Δ::hisG/ tac1-2Δ::hisG med3Δ::FRT/MED3</i>                                                                              | This study |
| yLM543  | yLM542              | <i>pSFS2-MED3KO</i>                       | <i>tac1-1Δ::hisG/ tac1-2Δ::hisG</i><br><i>med3Δ::FRT/med3Δ::FRT</i>                                                              | This study |
| yLM544  | DSY2906<br>(yLM166) | <i>pSFS2-SSN3KO</i>                       | <i>tac1-1Δ::hisG/ tac1-2Δ::hisG ssn3Δ::FRT/SSN3</i>                                                                              | This study |
| yLM545  | yLM544              | <i>pSFS2-SSN3KO</i>                       | <i>tac1-1Δ::hisG/ tac1-2Δ::hisG</i><br><i>ssn3Δ::FRT/ssn3Δ::FRT</i>                                                              | This study |
| yLM546  | yLM485              | <i>pSFS2-MED3KO</i>                       | <i>tac1-1Δ::hisG/ tac1-2Δ::hisG</i><br><i>LEU2::P<sub>TAC1</sub>-6HIS3FLAG-TAC1-1/URA3</i><br><i>med3Δ::FRT/MED3</i>             | This study |
| yLM547  | yLM546              | <i>pSFS2-MED3KO</i>                       | <i>tac1-1Δ::hisG/ tac1-2Δ::hisG</i><br><i>LEU2::P<sub>TAC1</sub>-6HIS3FLAG-TAC1-1/URA3</i><br><i>med3Δ::FRT/med3Δ::FRT</i>       | This study |
| yLM548  | yLM534              | <i>pSFS2-MED3KO</i>                       | <i>tac1-1Δ::hisG/ tac1-2Δ::hisG</i><br><i>LEU2::P<sub>TAC1</sub>-6HIS3FLAG-TAC1-1-N972D/URA3</i><br><i>med3Δ::FRT/MED3</i>       | This study |
| yLM549  | yLM548              | <i>pSFS2-MED3KO</i>                       | <i>tac1-1Δ::hisG/ tac1-2Δ::hisG</i><br><i>LEU2::P<sub>TAC1</sub>-6HIS3FLAG-TAC1-1-N972D/URA3</i><br><i>med3Δ::FRT/med3Δ::FRT</i> | This study |
| yLM550  | yLM543              | <i>TAC1InteHF-R69</i><br>3K               | <i>tac1-1Δ::hisG/ tac1-2Δ::hisG</i><br><i>med3Δ::FRT/med3Δ::FRT</i><br><i>LEU2::P<sub>TAC1</sub>-6HIS3FLAG-TAC1-1-R693K/URA3</i> | This study |
| yLM551  | yLM543              | <i>TAC1InteHF-Δ962-969</i>                | <i>tac1-1Δ::hisG/ tac1-2Δ::hisG</i><br><i>med3Δ::FRT/med3Δ::FRT</i>                                                              | This study |



|                    |                     |                                                 |                                                                                                                                     |              |
|--------------------|---------------------|-------------------------------------------------|-------------------------------------------------------------------------------------------------------------------------------------|--------------|
|                    |                     |                                                 | <i>LEU2::P<sub>TAC1</sub>-6HIS3FLAG-TAC1-1-A962-969/URA3</i>                                                                        |              |
| yLM552             | yLM545              | <i>TAC1InteHF-WT</i>                            | <i>tac1-1Δ::hisG/ tac1-2Δ::hisG</i><br><i>ssn3A::FRT/ssn3A::FRT</i><br><i>LEU2::P<sub>TAC1</sub>-6HIS3FLAG-TAC1-1/URA3</i>          | This study   |
| yLM553             | yLM545              | <i>TAC1InteHF-R693K</i>                         | <i>tac1-1Δ::hisG/ tac1-2Δ::hisG</i><br><i>ssn3A::FRT/ssn3A::FRT</i><br><i>LEU2::P<sub>TAC1</sub>-6HIS3FLAG-TAC1-1-R693K/URA3</i>    | This study   |
| yLM554             | yLM545              | <i>TAC1InteHF-Δ962-969</i>                      | <i>tac1-1Δ::hisG/ tac1-2Δ::hisG</i><br><i>ssn3A::FRT/ssn3A::FRT</i><br><i>LEU2::P<sub>TAC1</sub>-6HIS3FLAG-TAC1-1-Δ962-969/URA3</i> | This study   |
| yLM555             | yLM534              | <i>pSFS2-SSN3KO</i>                             | <i>tac1-1Δ::hisG/ tac1-2Δ::hisG</i><br><i>LEU2::P<sub>TAC1</sub>-6HIS3FLAG-TAC1-1-N972D/URA3</i><br><i>ssn3A::FRT/SSN3</i>          | This study   |
| yLM556             | yLM555              | <i>pSFS2-SSN3KO</i>                             | <i>tac1-1Δ::hisG/ tac1-2Δ::hisG</i><br><i>LEU2::P<sub>TAC1</sub>-6HIS3FLAG-TAC1-1-N972D/URA3</i><br><i>ssn3A::FRT/ssn3A::FRT</i>    | This study   |
| yLM557             | yLM504              |                                                 | <i>tac1-1Δ::hisG/ tac1-2Δ::hisG</i><br><i>LEU2::TAC1-1-AM677/URA3</i><br><i>med3A::FRT/med3A::FRT</i><br><i>CDR1::CDR1-3HA/CDR1</i> | This study   |
| SCMRR1M4A (yLM468) | -                   |                                                 | <i>mrr1Δ::FRT/mrr1Δ::FRT</i>                                                                                                        | (7)          |
| yLM558             | SCMRR1M4A (yLM468)  | <i>P<sub>MRR1</sub>-HF-MD-TAC1<sup>WT</sup></i> | <i>mrr1Δ::FRT/mrr1Δ::P<sub>MRR1</sub>-6HIS3FLAG-MRR1DBD(aa1-123)-TAC1<sup>ΔDBD</sup>(aa130-981)</i>                                 | This study   |
| yLM559             | DSY2906 (yLM166)    |                                                 | <i>tac1-1Δ::hisG/ tac1-2Δ::hisG</i><br><i>MED17-3HA-SAT1/MED17</i>                                                                  | This study   |
| yLM560             | DSY2937-35 (yLM167) |                                                 | <i>tac1-1Δ::hisG/ tac1-2Δ::hisG</i> <i>LEU2::TAC1-1/URA3</i><br><i>MED8-3HA-SAT1/MED8</i>                                           | This study   |
| yLM482             | DSY2937-35 (yLM167) |                                                 | <i>tac1-1Δ::hisG/ tac1-2Δ::hisG</i> <i>LEU2::TAC1-1/URA3</i><br><i>MED17-3HA-SAT1/MED17</i>                                         | This study # |
| yLM483             | yLM232              |                                                 | <i>tac1-1Δ::hisG/ tac1-2Δ::hisG</i> <i>LEU2::TAC1-1/URA3</i><br><i>med3A::FRT/med3A::FRT</i><br><i>MED17-3HA-SAT1/MED17</i>         | This study # |
| yLM561             | ACY13 (yLM169)      |                                                 | <i>tac1-1Δ::hisG/ tac1-2Δ::hisG</i><br><i>LEU2::TAC1-1-A736V/URA3</i><br><i>MED17-3HA-SAT1/MED17</i>                                | This study   |
| yLM562             | yLM234              |                                                 | <i>tac1-1Δ::hisG/ tac1-2Δ::hisG</i><br><i>LEU2::TAC1-1-A736V/URA3</i> <i>med3A::FRT/med3A::FRT</i><br><i>MED17-3HA-SAT1/MED17</i>   | This study   |
| yLM563             | yLM493              |                                                 | <i>tac1-1Δ::hisG/ tac1-2Δ::hisG</i><br><i>LEU2::TAC1-1-N972D/URA3</i><br><i>MED17-3HA-SAT1/MED17</i>                                | This study   |

|                                                 |        |                                                  |                                                                                                                                                                            |            |
|-------------------------------------------------|--------|--------------------------------------------------|----------------------------------------------------------------------------------------------------------------------------------------------------------------------------|------------|
| yLM564                                          | yLM495 |                                                  | <i>tac1-1Δ::hisG/ tac1-2Δ::hisG</i><br><i>LEU2::TAC1-1-N972D/URA3</i><br><i>med3Δ::FRT/med3Δ::FRT</i><br><i>MED17-3HA-SAT1/MED17</i>                                       | This study |
| yLM565                                          | yLM496 |                                                  | <i>tac1-1Δ::hisG/ tac1-2Δ::hisG</i><br><i>LEU2::TAC1-1-N977D/URA3</i><br><i>MED17-3HA-SAT1/MED17</i>                                                                       | This study |
| yLM566                                          | yLM498 |                                                  | <i>tac1-1Δ::hisG/ tac1-2Δ::hisG</i><br><i>LEU2::TAC1-1-N977D/URA3</i><br><i>med3Δ::FRT/med3Δ::FRT</i><br><i>MED17-3HA-SAT1/MED17</i>                                       | This study |
| <i>SSN3-3HA/</i><br><i>SSN3-3HA</i><br>(yLM481) | BWP17  |                                                  | <i>ura3Δ::λimm434/ura3Δ::λimm434</i><br><i>his1Δ::hisG/his1Δ::hisG arg4Δ::hisG/arg4Δ::hisG</i><br><i>SSN3::SSN3-3HA-HIS1/SSN3::SSN3-3HA-SAT1</i>                           | (8)        |
| cRC106                                          | -      |                                                  | <i>ura3Δ::λimm<sup>434</sup>/ura3Δ::λimm<sup>434</sup></i><br><i>ade2::hisG/ade2::hisG::[pOPlacZ]</i>                                                                      | (9)        |
| yLM567                                          | cRC106 | Clp-LexA                                         | <i>ura3Δ::λimm<sup>434</sup>/ura3Δ::λimm<sup>434</sup></i><br><i>ade2::hisG/ade2::hisG::[pOPlacZ]</i><br><i>RPS10/rps10Δ::[LexA]/URA3</i>                                  | This study |
| yLM568                                          | cRC106 | Clp-LexA-<br>Tac1 <sup>130-981</sup> WT          | <i>ura3Δ::λimm<sup>434</sup>/ura3Δ::λimm<sup>434</sup></i><br><i>ade2::hisG/ade2::hisG::[pOPlacZ] RPS10/rps10Δ::</i><br><i>[LexA-TAC1<sup>130-981</sup> WT]/URA3</i>       | This study |
| yLM569                                          | cRC106 | Clp-LexA-<br>Tac1 <sup>130-981</sup> T225A       | <i>ura3Δ::λimm<sup>434</sup>/ura3Δ::λimm<sup>434</sup></i><br><i>ade2::hisG/ade2::hisG::[pOPlacZ] RPS10/rps10Δ::</i><br><i>[LexA-TAC1<sup>130-981</sup> T225A]/URA3</i>    | This study |
| yLM570                                          | cRC106 | Clp-LexA-<br>Tac1 <sup>130-981</sup> E461K       | <i>ura3Δ::λimm<sup>434</sup>/ura3Δ::λimm<sup>434</sup></i><br><i>ade2::hisG/ade2::hisG::[pOPlacZ] RPS10/rps10Δ::</i><br><i>[LexA-TAC1<sup>130-981</sup> E461K]/URA3</i>    | This study |
| yLM571                                          | cRC106 | Clp-LexA-<br>Tac1 <sup>130-981</sup> ΔM677       | <i>ura3Δ::λimm<sup>434</sup>/ura3Δ::λimm<sup>434</sup></i><br><i>ade2::hisG/ade2::hisG::[pOPlacZ] RPS10/rps10Δ::</i><br><i>[LexA-TAC1<sup>130-981</sup> ΔM677]/URA3</i>    | This study |
| yLM572                                          | cRC106 | Clp-LexA-<br>Tac1 <sup>130-981</sup> A736V       | <i>ura3Δ::λimm<sup>434</sup>/ura3Δ::λimm<sup>434</sup></i><br><i>ade2::hisG/ade2::hisG::[pOPlacZ] RPS10/rps10Δ::</i><br><i>[LexA-TAC1<sup>130-981</sup> A736V]/URA3</i>    | This study |
| yLM573                                          | cRC106 | Clp-LexA-<br>Tac1 <sup>130-981</sup> N972D       | <i>ura3Δ::λimm<sup>434</sup>/ura3Δ::λimm<sup>434</sup></i><br><i>ade2::hisG/ade2::hisG::[pOPlacZ] RPS10/rps10Δ::</i><br><i>[LexA-TAC1<sup>130-981</sup> N972D]/URA3</i>    | This study |
| yLM574                                          | cRC106 | Clp-LexA-<br>Tac1 <sup>130-981</sup><br>Δ962-969 | <i>ura3Δ::λimm<sup>434</sup>/ura3Δ::λimm<sup>434</sup></i><br><i>ade2::hisG/ade2::hisG::[pOPlacZ] RPS10/rps10Δ::</i><br><i>[LexA-TAC1<sup>130-981</sup> Δ962-969]/URA3</i> | This study |
| yLM575                                          | cRC106 | Clp-LexA-<br>Tac1 <sup>130-981</sup> N977D       | <i>ura3Δ::λimm<sup>434</sup>/ura3Δ::λimm<sup>434</sup></i><br><i>ade2::hisG/ade2::hisG::[pOPlacZ] RPS10/rps10Δ::</i><br><i>[LexA-TAC1<sup>130-981</sup> N977D]/URA3</i>    | This study |
| yLM576                                          | cRC106 | Clp-LexA-                                        | <i>ura3Δ::λimm<sup>434</sup>/ura3Δ::λimm<sup>434</sup></i>                                                                                                                 | This study |

|        |        |                                                  |                                                                                                                                                                                    |            |
|--------|--------|--------------------------------------------------|------------------------------------------------------------------------------------------------------------------------------------------------------------------------------------|------------|
|        |        | Tac1 <sup>130-981</sup> G980E                    | <i>ade2::hisG/ade2::hisG::[pOPlacZ] RPS10/rps10Δ::<br/>[LexA-TAC1<sup>130-981</sup> G980E]/URA3</i>                                                                                |            |
| yLM577 | cRC106 | Clp-LexA-<br>Tac1 <sup>130-981</sup><br>G980W    | <i>ura3Δ::λimm<sup>434</sup>/ura3Δ::λimm<sup>434</sup><br/>ade2::hisG/ade2::hisG::[pOPlacZ] RPS10/rps10Δ::<br/>[LexA-TAC1<sup>130-981</sup> G980W]/URA3</i>                        | This study |
| yLM578 | cRC106 | Clp-LexA-<br>Tac1 <sup>130-931</sup> WT          | <i>ura3Δ::λimm<sup>434</sup>/ura3Δ::λimm<sup>434</sup><br/>ade2::hisG/ade2::hisG::[pOPlacZ] RPS10/rps10Δ::<br/>[LexA-TAC1<sup>130-931</sup>]/URA3</i>                              | This study |
| yLM579 | cRC106 | Clp-LexA-<br>Tac1 <sup>856-981</sup> WT          | <i>ura3Δ::λimm<sup>434</sup>/ura3Δ::λimm<sup>434</sup><br/>ade2::hisG/ade2::hisG::[pOPlacZ] RPS10/rps10Δ::<br/>[LexA-TAC1<sup>856-981</sup>]/URA3</i>                              | This study |
| yLM580 | cRC106 | Clp-LexA-<br>Tac1 <sup>932-981</sup> WT          | <i>ura3Δ::λimm<sup>434</sup>/ura3Δ::λimm<sup>434</sup><br/>ade2::hisG/ade2::hisG::[pOPlacZ] RPS10/rps10Δ::<br/>[LexA-TAC1<sup>932-981</sup>]/URA3</i>                              | This study |
| yLM581 | cRC106 | Clp-LexA-<br>Tac1 <sup>856-981</sup> N972D       | <i>ura3Δ::λimm<sup>434</sup>/ura3Δ::λimm<sup>434</sup><br/>ade2::hisG/ade2::hisG::[pOPlacZ] RPS10/rps10Δ::<br/>[LexA-TAC1<sup>856-981</sup> N972D]/URA3</i>                        | This study |
| yLM582 | cRC106 | Clp-LexA-<br>Tac1 <sup>856-981</sup><br>Δ962-969 | <i>ura3Δ::λimm<sup>434</sup>/ura3Δ::λimm<sup>434</sup><br/>ade2::hisG/ade2::hisG::[pOPlacZ] RPS10/rps10Δ::<br/>[LexA-TAC1<sup>856-981</sup> Δ962-969]/URA3</i>                     | This study |
| yLM583 | cRC106 | Clp-LexA-<br>Tac1 <sup>856-981</sup> N977D       | <i>ura3Δ::λimm<sup>434</sup>/ura3Δ::λimm<sup>434</sup><br/>ade2::hisG/ade2::hisG::[pOPlacZ] RPS10/rps10Δ::<br/>[LexA-TAC1<sup>856-981</sup> N977D]/URA3</i>                        | This study |
| yLM584 | cRC106 | Clp-LexA-<br>Tac1 <sup>856-981</sup> G980E       | <i>ura3Δ::λimm<sup>434</sup>/ura3Δ::λimm<sup>434</sup><br/>ade2::hisG/ade2::hisG::[pOPlacZ] RPS10/rps10Δ::<br/>[LexA-TAC1<sup>856-981</sup> G980E]/URA3</i>                        | This study |
| yLM585 | cRC106 | Clp-LexA-<br>Tac1 <sup>856-981</sup><br>G980W    | <i>ura3Δ::λimm<sup>434</sup>/ura3Δ::λimm<sup>434</sup><br/>ade2::hisG/ade2::hisG::[pOPlacZ] RPS10/rps10Δ::<br/>[LexA-TAC1<sup>856-981</sup> G980W]/URA3</i>                        | This study |
| yLM586 | cRC106 | <i>pSFS2-MED3KO</i>                              | <i>ura3Δ::λimm<sup>434</sup>/ura3Δ::λimm<sup>434</sup><br/>ade2::hisG/ade2::hisG::[pOPlacZ]<br/>med3Δ::FRT/MED3</i>                                                                | This study |
| yLM587 | yLM586 | <i>pSFS2-MED3KO</i>                              | <i>ura3Δ::λimm<sup>434</sup>/ura3Δ::λimm<sup>434</sup><br/>ade2::hisG/ade2::hisG::[pOPlacZ]<br/>med3Δ::FRT/med3Δ::FRT</i>                                                          | This study |
| yLM588 | yLM587 | Clp-LexA                                         | <i>ura3Δ::λimm<sup>434</sup>/ura3Δ::λimm<sup>434</sup><br/>ade2::hisG/ade2::hisG::[pOPlacZ]<br/>med3Δ::FRT/med3Δ::FRT<br/>RPS10/rps10Δ::[LexA]/URA3</i>                            | This study |
| yLM589 | yLM587 | Clp-LexA-<br>Tac1 <sup>130-981</sup> WT          | <i>ura3Δ::λimm<sup>434</sup>/ura3Δ::λimm<sup>434</sup><br/>ade2::hisG/ade2::hisG::[pOPlacZ]<br/>med3Δ::FRT/med3Δ::FRT RPS10/rps10Δ::<br/>[LexA-TAC1<sup>130-981</sup> WT]/URA3</i> | This study |
| yLM590 | yLM587 | Clp-LexA-                                        | <i>ura3Δ::λimm<sup>434</sup>/ura3Δ::λimm<sup>434</sup></i>                                                                                                                         | This study |

|        |        |                                                 |                                                                                                                                                                                                        |            |
|--------|--------|-------------------------------------------------|--------------------------------------------------------------------------------------------------------------------------------------------------------------------------------------------------------|------------|
|        |        | Tac1 <sup>130-981</sup> A736V                   | <i>ade2::hisG/ade2::hisG::[pOPlacZ]</i><br><b>med3Δ::FRT/med3Δ::FRT RPS10/rps10Δ::</b><br><b>[LexA-TAC1<sup>130-981</sup>A736V]/URA3</b>                                                               |            |
| yLM591 | yLM587 | Cip-LexA-<br>Tac1 <sup>130-981</sup> N977D      | <i>ura3Δ::λimm<sup>434</sup>/ura3Δ::λimm<sup>434</sup></i><br><i>ade2::hisG/ade2::hisG::[pOPlacZ]</i><br><b>med3Δ::FRT/med3Δ::FRT RPS10/rps10Δ::</b><br><b>[LexA-TAC1<sup>130-981</sup>N977D]/URA3</b> | This study |
| yLM592 | yLM587 | Cip-LexA-<br>Tac1 <sup>130-981</sup> G980E      | <i>ura3Δ::λimm<sup>434</sup>/ura3Δ::λimm<sup>434</sup></i><br><i>ade2::hisG/ade2::hisG::[pOPlacZ]</i><br><b>med3Δ::FRT/med3Δ::FRT RPS10/rps10Δ::</b><br><b>[LexA-TAC1<sup>130-981</sup>G980E]/URA3</b> | This study |
| yLM593 | yLM587 | Cip-LexA-<br>Tac1 <sup>856-981</sup> WT         | <i>ura3Δ::λimm<sup>434</sup>/ura3Δ::λimm<sup>434</sup></i><br><i>ade2::hisG/ade2::hisG::[pOPlacZ]</i><br><b>med3Δ::FRT/med3Δ::FRT RPS10/rps10Δ::</b><br><b>[LexA-TAC1<sup>856-981</sup>]/URA3</b>      | This study |
| yLM594 | yLM587 | Cip-LexA-<br>Tac1 <sup>932-981</sup> WT         | <i>ura3Δ::λimm<sup>434</sup>/ura3Δ::λimm<sup>434</sup></i><br><i>ade2::hisG/ade2::hisG::[pOPlacZ]</i><br><b>med3Δ::FRT/med3Δ::FRT RPS10/rps10Δ::</b><br><b>[LexA-TAC1<sup>932-981</sup>]/URA3</b>      | This study |
| yLM595 | yLM543 | <i>TAC1InteHF-N97</i><br><i>2D<sub>OE</sub></i> | <b>tac1-1Δ::hisG/ tac1-2Δ::hisG</b><br><b>med3Δ::FRT/med3Δ::FRT</b><br><b>LEU2::P<sub>ACT1</sub>-6HIS3FLAG-TAC1-1-N972D/URA3</b>                                                                       | This study |
| BWP17  |        |                                                 | <i>ura3Δ::λimm434/ura3Δ::λimm434</i><br><i>his1Δ::hisG/his1Δ::hisG arg4Δ::hisG/arg4Δ::hisG</i>                                                                                                         | (10)       |
| yLM265 | BWP17  |                                                 | <b>ssn3Δ/ssn3Δ</b>                                                                                                                                                                                     | This study |
| yLM279 | yLM265 |                                                 | <b>ssn3Δ/ssn3::SSN3<sup>WT</sup></b>                                                                                                                                                                   | This study |
| yLM276 | yLM265 |                                                 | <b>ssn3Δ/ssn3::SSN3<sup>D325A</sup></b>                                                                                                                                                                | This study |
| yLM596 | yLM279 | <i>TAC1InteHF-WT<sub>O</sub></i><br><i>E</i>    | <b>ssn3Δ/ssn3::SSN3<sup>WT</sup></b><br><b>LEU2::P<sub>ACT1</sub>-6HIS3FLAG-TAC1-1</b>                                                                                                                 | This study |
| yLM660 | yLM276 | <i>TAC1InteHF-WT<sub>O</sub></i><br><i>E</i>    | <b>ssn3Δ/ssn3::SSN3<sup>D325A</sup></b><br><b>LEU2::P<sub>ACT1</sub>-6HIS3FLAG-TAC1-1</b>                                                                                                              | This study |
| yLM597 | yLM485 |                                                 | <b>tac1-1Δ::hisG/ tac1-2Δ::hisG</b><br><b>LEU2::P<sub>TAC1</sub>-6HIS3FLAG-TAC1-1/URA3</b><br><b>MED17-3HA-SAT1/MED17</b>                                                                              | This study |
| yLM598 | yLM539 |                                                 | <b>tac1-1Δ::hisG/ tac1-2Δ::hisG</b><br><b>LEU2::P<sub>TAC1</sub>-6HIS3FLAG-TAC1-1-ΔTAD(aa1-845)</b><br><b>/URA3 MED17-3HA-SAT1/MED17</b>                                                               | This study |
| yLM599 | yLM503 | <i>pSFS2-CDR2KO</i><br><b>(two rounds)</b>      | <b>tac1-1Δ::hisG/ tac1-2Δ::hisG</b><br><b>LEU2::TAC1-1-ΔM677/URA3</b><br><b>med3Δ::FRT/MED3 cdr2Δ::FRT/cdr2Δ::FRT</b>                                                                                  | This study |
| yLM600 | yLM599 | <i>pSFS2-MED3KO</i>                             | <b>tac1-1Δ::hisG/ tac1-2Δ::hisG</b><br><b>LEU2::TAC1-1-ΔM677 /URA3</b><br><b>med3Δ::FRT/med3Δ::FRT</b><br><b>cdr2Δ::FRT/cdr2Δ::FRT</b>                                                                 | This study |

|        |                        |                                   |                                                                                                               |                 |
|--------|------------------------|-----------------------------------|---------------------------------------------------------------------------------------------------------------|-----------------|
| yLM471 | DSY2937-35<br>(yLM167) | <i>pSFS2- SNF2KO</i>              | <i>tac1-1Δ::hisG/ tac1-2Δ::hisG LEU2::TAC1-1/URA3<br/>snf2Δ::FRT/ SNF2</i>                                    | This study<br># |
| yLM472 | yLM471                 | <i>pSFS2- SNF2KO</i>              | <i>tac1-1Δ::hisG/ tac1-2Δ::hisG LEU2::TAC1-1/URA3<br/>snf2Δ::FRT/ snf2Δ::FRT</i>                              | This study<br># |
| yLM473 | ACY67<br>(yLM168)      | <i>pSFS2- SNF2KO</i>              | <i>tac1-1Δ::hisG/ tac1-2Δ::hisG<br/>LEU2::TAC1-1-T225A/URA3 snf2Δ::FRT/SNF2</i>                               | This study<br># |
| yLM474 | yLM473                 | <i>pSFS2- SNF2KO</i>              | <i>tac1-1Δ::hisG/ tac1-2Δ::hisG<br/>LEU2::TAC1-1-T225A/URA3 snf2Δ::FRT/<br/>snf2Δ::FRT</i>                    | This study<br># |
| yLM475 | ACY13<br>(yLM169)      | <i>pSFS2- SNF2KO</i>              | <i>tac1-1Δ::hisG/ tac1-2Δ::hisG<br/>LEU2::TAC1-1-A736V/URA3 snf2Δ::FRT/SNF2</i>                               | This study<br># |
| yLM476 | yLM475                 | <i>pSFS2- SNF2KO</i>              | <i>tac1-1Δ::hisG/ tac1-2Δ::hisG<br/>LEU2::TAC1-1-G980E/URA3 snf2Δ::FRT/<br/>snf2Δ::FRT</i>                    | This study<br># |
| yLM477 | ACY71<br>(yLM170)      | <i>pSFS2- SNF2KO</i>              | <i>tac1-1Δ::hisG/ tac1-2Δ::hisG<br/>LEU2::TAC1-1-G980E/URA3 snf2Δ::FRT/SNF2</i>                               | This study<br># |
| yLM478 | yLM477                 | <i>pSFS2- SNF2KO</i>              | <i>tac1-1Δ::hisG/ tac1-2Δ::hisG<br/>LEU2::TAC1-1-G980E/URA3 snf2Δ::FRT/<br/>snf2Δ::FRT</i>                    | This study<br># |
| yLM601 | DSY2906<br>(yLM166)    | <i>TAC1Inte<br/>HF-E461K</i>      | <i>tac1-1Δ::hisG/ tac1-2Δ::hisG<br/>LEU2::P<sub>TAC1</sub>-6HIS3FLAG-TAC1-1- E461K/URA3</i>                   | This study      |
| yLM602 | DSY2906<br>(yLM166)    | <i>TAC1Inte R693K</i>             | <i>tac1-1Δ::hisG/ tac1-2Δ::hisG<br/>LEU2::P<sub>TAC1</sub>-TAC1-1-R693K/URA3</i>                              | This study      |
| yLM603 | DSY2906<br>(yLM166)    | <i>TAC1InteHF-E46<br/>1KΔTAD</i>  | <i>tac1-1Δ::hisG/ tac1-2Δ::hisG<br/>LEU2::P<sub>TAC1</sub>-6HIS3FLAG-TAC1-1-E461K-ΔTAD(a<br/>a1-845)/URA3</i> | This study      |
| yLM604 | DSY2906<br>(yLM166)    | <i>TAC1InteHF-<br/>ΔMM677ΔTAD</i> | <i>tac1-1Δ::hisG/ tac1-2Δ::hisG<br/>LEU2::P<sub>TAC1</sub>-6HIS3FLAG-TAC1-1-ΔM677-ΔTAD(<br/>aa1-845)/URA3</i> | This study      |
| yLM605 | DSY2906<br>(yLM166)    | <i>TAC1InteHF-<br/>R693KΔTAD</i>  | <i>tac1-1Δ::hisG/ tac1-2Δ::hisG<br/>LEU2::P<sub>TAC1</sub>-6HIS3FLAG-TAC1-1-R693K-ΔTAD(a<br/>a1-845)/URA3</i> | This study      |
| yLM606 | DSY2906<br>(yLM166)    | <i>TAC1InteHF-<br/>A736VΔTAD</i>  | <i>tac1-1Δ::hisG/ tac1-2Δ::hisG<br/>LEU2::P<sub>TAC1</sub>-6HIS3FLAG-TAC1-1-A736V-ΔTAD(a<br/>a1-845)/URA3</i> | This study      |
| yLM607 | DSY2906<br>(yLM166)    | <i>TAC1Inte<br/>E461KΔTAD</i>     | <i>tac1-1Δ::hisG/ tac1-2Δ::hisG<br/>LEU2::P<sub>TAC1</sub>-TAC1-1-E461K-ΔTAD<br/>(aa1-845)/URA3</i>           | This study      |
| yLM608 | DSY2906<br>(yLM166)    | <i>TAC1Inte<br/>AM677ΔTAD</i>     | <i>tac1-1Δ::hisG/ tac1-2Δ::hisG<br/>LEU2::P<sub>TAC1</sub>-TAC1-1-AM677-ΔTAD<br/>(aa1-845)/URA3</i>           | This study      |
| yLM609 | DSY2906<br>(yLM166)    | <i>TAC1Inte<br/>R693KΔTAD</i>     | <i>tac1-1Δ::hisG/ tac1-2Δ::hisG<br/>LEU2::P<sub>TAC1</sub>-TAC1-1-R693K-ΔTAD<br/>(aa1-845)/URA3</i>           | This study      |

|        |                        |                                                        |                                                                                                                                                        |            |
|--------|------------------------|--------------------------------------------------------|--------------------------------------------------------------------------------------------------------------------------------------------------------|------------|
| yLM610 | DSY2906<br>(yLM166)    | <i>TAC1</i> Inte<br><i>A736V</i> <i>ΔTAD</i>           | <i>tac1-1Δ::hisG/ tac1-2Δ::hisG</i><br><i>LEU2::P<sub>TAC1</sub>-TAC1-1-A736V-ΔTAD</i><br><i>(aa1-845)/URA3</i>                                        | This study |
| yLM611 | DSY2937-35<br>(yLM167) | <i>pSFS2-CDR1KO</i> ;<br>Transient Cas9<br>system (11) | <i>tac1-1Δ::hisG/ tac1-2Δ::hisG</i><br><i>LEU2::P<sub>TAC1</sub>-TAC1-1/URA3</i><br><i>cdr1A::FRT/cdr1A::FRT</i>                                       | This study |
| yLM612 | ACY13<br>(yLM169)      | <i>pSFS2-CDR1KO</i> ;<br>Transient Cas9<br>system      | <i>tac1-1Δ::hisG/ tac1-2Δ::hisG</i><br><i>LEU2::P<sub>TAC1</sub>-TAC1-1-A736V/URA3</i><br><i>cdr1A::FRT/cdr1A::FRT</i>                                 | This study |
| yLM613 | yLM493                 | <i>pSFS2-CDR1KO</i> ;<br>Transient Cas9<br>system      | <i>tac1-1Δ::hisG/ tac1-2Δ::hisG</i><br><i>LEU2::P<sub>TAC1</sub>-TAC1-1-N972D/URA3</i><br><i>cdr1A::FRT/cdr1A::FRT</i>                                 | This study |
| yLM614 | yLM496                 | <i>pSFS2-CDR1KO</i> ;<br>Transient Cas9<br>system      | <i>tac1-1Δ::hisG/ tac1-2Δ::hisG</i><br><i>LEU2::P<sub>TAC1</sub>-TAC1-1-N977D/URA3</i> <i>cdr1A::FRT/</i><br><i>cdr1A::FRT</i>                         | This study |
| yLM615 | yLM234                 | <i>pSFS2-CDR1KO</i> ;<br>Transient Cas9<br>system      | <i>tac1-1Δ::hisG/ tac1-2Δ::hisG</i><br><i>LEU2::P<sub>TAC1</sub>-TAC1-1-A736V/URA3</i><br><i>med3A::FRT/med3A::FRT</i><br><i>cdr1A::FRT/cdr1A::FRT</i> | This study |
| yLM616 | yLM495                 | <i>pSFS2-CDR1KO</i> ;<br>Transient Cas9<br>system      | <i>tac1-1Δ::hisG/ tac1-2Δ::hisG</i><br><i>LEU2::P<sub>TAC1</sub>-TAC1-1-N972D/URA3</i><br><i>med3A::FRT/med3A::FRT</i><br><i>cdr1A::FRT/cdr1A::FRT</i> | This study |
| yLM617 | yLM498                 | <i>pSFS2-CDR1KO</i> ;<br>Transient Cas9<br>system      | <i>tac1-1Δ::hisG/ tac1-2Δ::hisG</i><br><i>LEU2::P<sub>TAC1</sub>-TAC1-1-N977D/URA3</i><br><i>med3A::FRT/med3A::FRT</i><br><i>cdr1A::FRT/cdr1A::FRT</i> | This study |

# These strains were also used in a parallel study.

\* yLM536 was found with ectopically high expression level of 6His3Flag-Tac1<sup>N977D</sup>, and used for affinity purification of the 6His3Flag-Tac1<sup>N977D</sup> sample analyzed in **Fig. 8C**.

**Table S5 Plasmids used in this study**

| <b>Plasmid <sup>a</sup></b> | <b>Description</b>                                                                                                                                                                  | <b>Checking Primers</b>    | <b>Ref.</b> |
|-----------------------------|-------------------------------------------------------------------------------------------------------------------------------------------------------------------------------------|----------------------------|-------------|
| pDS1097                     | Vector for integrating <i>TAC1</i> promoter driven <i>TAC1-1</i> (wild type allele referred as <i>TAC1<sup>WT</sup></i> in this study) with <i>URA3</i> marker to <i>LEU2</i> locus |                            | (1)         |
| pAC153                      | Vector for integrating <i>TAC1</i> promoter driven <i>TAC1<sup>T225A</sup></i> with <i>URA3</i> marker to <i>LEU2</i> locus                                                         |                            | (3)         |
| pAC97                       | Vector for integrating <i>TAC1</i> promoter driven <i>TAC1<sup>A736V</sup></i> with <i>URA3</i> marker to <i>LEU2</i> locus                                                         |                            | (3)         |
| pAC157                      | Vector for integrating <i>TAC1</i> promoter driven <i>TAC1<sup>G980E</sup></i> with <i>URA3</i> marker to <i>LEU2</i> locus                                                         |                            | (3)         |
| <i>TAC1InteE461K</i>        | Vector for integrating <i>TAC1</i> promoter driven <i>TAC1<sup>E461K</sup></i> with <i>URA3</i> marker to <i>LEU2</i> locus                                                         | ZL536/ZL537<br>ZL538/ZL539 | This study  |
| <i>TAC1InteΔM677</i>        | Vector for integrating <i>TAC1</i> promoter driven <i>TAC1<sup>ΔM677</sup></i> with <i>URA3</i> marker to <i>LEU2</i> locus                                                         | ZL536/ZL537<br>ZL538/ZL539 | This study  |
| <i>TAC1InteN972D</i>        | Vector for integrating <i>TAC1</i> promoter driven <i>TAC1<sup>N972D</sup></i> with <i>URA3</i> marker to <i>LEU2</i> locus                                                         | ZL536/ZL537<br>ZL538/ZL539 | This study  |
| <i>TAC1InteN977D</i>        | Vector for integrating <i>TAC1</i> promoter driven <i>TAC1<sup>N977D</sup></i> with <i>URA3</i> marker to <i>LEU2</i> locus                                                         | ZL536/ZL537<br>ZL538/ZL539 | This study  |
| <i>TAC1InteΔ962-969</i>     | Vector for integrating <i>TAC1</i> promoter driven <i>TAC1<sup>Δ962-969</sup></i> with <i>URA3</i> marker to <i>LEU2</i> locus                                                      | ZL536/ZL537<br>ZL538/ZL539 | This study  |
| <i>TAC1InteR693K</i>        | Vector for integrating <i>TAC1</i> promoter driven <i>TAC1<sup>R693K</sup></i> with <i>URA3</i> marker to <i>LEU2</i> locus                                                         | ZL536/ZL537<br>ZL538/ZL539 | This study  |
| <i>TAC1InteG980W</i>        | Vector for integrating <i>TAC1</i> promoter driven <i>TAC1<sup>G980W</sup></i> with <i>URA3</i> marker to <i>LEU2</i> locus                                                         | ZL536/ZL537<br>ZL538/ZL539 | This study  |
| <i>TAC1InteHF-WT</i>        | Vector for integrating <i>TAC1</i> promoter driven <b>6HIS3FLAG</b> tagged <i>TAC1<sup>WT</sup></i> with <i>URA3</i> marker to <i>LEU2</i> locus                                    | ZL536/ZL537<br>ZL538/ZL539 | This study  |
| <i>TAC1InteHF-A736V</i>     | Vector for integrating <i>TAC1</i> promoter driven <b>6HIS3FLAG</b> tagged <i>TAC1<sup>A736V</sup></i> with <i>URA3</i> marker to <i>LEU2</i> locus                                 | ZL536/ZL537<br>ZL538/ZL539 | This study  |
| <i>TAC1InteHF-R693K</i>     | Vector for integrating <i>TAC1</i> promoter driven <b>6HIS3FLAG</b> tagged <i>TAC1<sup>R693K</sup></i> with <i>URA3</i> marker to <i>LEU2</i> locus                                 | ZL536/ZL537<br>ZL538/ZL539 | This study  |
| <i>TAC1InteHF-ΔM677</i>     | Vector for integrating <i>TAC1</i> promoter driven <b>6HIS3FLAG</b> tagged <i>TAC1<sup>ΔM677</sup></i> with <i>URA3</i> marker to <i>LEU2</i> locus                                 | ZL536/ZL537<br>ZL538/ZL539 | This study  |
| <i>TAC1InteHF-N972D</i>     | Vector for integrating <i>TAC1</i> promoter driven <b>6HIS3FLAG</b> tagged <i>TAC1<sup>N972D</sup></i> with <i>URA3</i> marker to <i>LEU2</i> locus                                 | ZL536/ZL537<br>ZL538/ZL539 | This study  |
| <i>TAC1InteHF-Δ962-969</i>  | Vector for integrating <i>TAC1</i> promoter driven <b>6HIS3FLAG</b> tagged <i>TAC1<sup>Δ962-969</sup></i> with <i>URA3</i> marker to <i>LEU2</i> locus                              | ZL536/ZL537<br>ZL538/ZL539 | This study  |
| <i>TAC1InteHF-N977D</i>     | Vector for integrating <i>TAC1</i> promoter driven <b>6HIS3FLAG</b> tagged <i>TAC1<sup>N977D</sup></i> with <i>URA3</i> marker to <i>LEU2</i> locus                                 | ZL536/ZL537<br>ZL538/ZL539 | This study  |
| <i>TAC1InteHF-C43Y</i>      | Vector for integrating <i>TAC1</i> promoter driven <b>6HIS3FLAG</b> tagged <i>TAC1<sup>C43Y</sup></i> with <i>URA3</i> marker to <i>LEU2</i> locus                                  | ZL536/ZL537<br>ZL538/ZL539 | This study  |

|                                        |                                                                                                                                                             |                                                      |            |
|----------------------------------------|-------------------------------------------------------------------------------------------------------------------------------------------------------------|------------------------------------------------------|------------|
| <i>TAC1</i> InteHF-R693K/C43Y          | Vector for integrating <i>TAC1</i> promoter driven <b>6HIS3FLAG</b> tagged <i>TAC1</i> <sup>R693K/C43Y</sup> with <i>URA3</i> marker to <i>LEU2</i> locus   | ZL536/ZL537<br>ZL538/ZL539                           | This study |
| <i>TAC1</i> InteHF-TAC1ΔTAD            | Vector for integrating <i>TAC1</i> promoter driven <b>6HIS3FLAG</b> tagged <i>TAC1</i> <sup>L-845</sup> (ΔTAD) with <i>URA3</i> marker to <i>LEU2</i> locus | ZL536/ZL537<br>ZL538/ZL539                           | This study |
| <i>TAC1</i> InteHF-WT <sub>OE</sub>    | Vector for integrating <i>ACT1</i> promoter driven <b>6HIS3FLAG</b> tagged <i>TAC1</i> <sup>WT</sup> with <i>URA3</i> marker to <i>LEU2</i> locus           | ZL536/ZL537<br>ZL538/ZL539                           | This study |
| <i>TAC1</i> InteHF-R693K <sub>OE</sub> | Vector for integrating <i>ACT1</i> promoter driven <b>6HIS3FLAG</b> tagged <i>TAC1</i> <sup>R693K</sup> with <i>URA3</i> marker to <i>LEU2</i> locus        | ZL536/ZL537<br>ZL538/ZL539                           | This study |
| <i>TAC1</i> InteHF-N972D <sub>OE</sub> | Vector for integrating <i>ACT1</i> promoter driven <b>6HIS3FLAG</b> tagged <i>TAC1</i> <sup>N972D</sup> with <i>URA3</i> marker to <i>LEU2</i> locus        | ZL536/ZL537<br>ZL538/ZL539                           | This study |
| <i>TAC1</i> InteHF-E461K               | Vector for integrating <i>TAC1</i> promoter driven <b>6HIS3FLAG</b> tagged <i>TAC1</i> <sup>E461K</sup> with <i>URA3</i> marker to <i>LEU2</i> locus        | ZL536/ZL537<br>ZL538/ZL539                           | This study |
| <i>TAC1</i> InteR693K                  | Vector for integrating <i>TAC1</i> promoter driven <i>TAC1</i> <sup>R693K</sup> with <i>URA3</i> marker to <i>LEU2</i> locus                                | ZL536/ZL537<br>ZL538/ZL539                           | This study |
| <i>TAC1</i> InteHF-E461KΔTAD           | Vector for integrating <i>TAC1</i> promoter driven <b>6HIS3FLAG</b> tagged <i>TAC1</i> <sup>E461K</sup> ΔTAD with <i>URA3</i> marker to <i>LEU2</i> locus   | ZL536/ZL537<br>ZL538/ZL539                           | This study |
| <i>TAC1</i> InteHF-ΔM677ΔTAD           | Vector for integrating <i>TAC1</i> promoter driven <b>6HIS3FLAG</b> tagged <i>TAC1</i> <sup>ΔM677</sup> ΔTAD with <i>URA3</i> marker to <i>LEU2</i> locus   | ZL536/ZL537<br>ZL538/ZL539                           | This study |
| <i>TAC1</i> InteHF-R693KΔTAD           | Vector for integrating <i>TAC1</i> promoter driven <b>6HIS3FLAG</b> tagged <i>TAC1</i> <sup>R693K</sup> ΔTAD with <i>URA3</i> marker to <i>LEU2</i> locus   | ZL536/ZL537<br>ZL538/ZL539                           | This study |
| <i>TAC1</i> InteHF-A736VΔTAD           | Vector for integrating <i>TAC1</i> promoter driven <b>6HIS3FLAG</b> tagged <i>TAC1</i> <sup>A736V</sup> ΔTAD with <i>URA3</i> marker to <i>LEU2</i> locus   | ZL536/ZL537<br>ZL538/ZL539                           | This study |
| <i>TAC1</i> InteE461KΔTAD              | Vector for integrating <i>TAC1</i> promoter driven <i>TAC1</i> <sup>E461K</sup> ΔTAD with <i>URA3</i> marker to <i>LEU2</i> locus                           | ZL536/ZL537<br>ZL538/ZL539                           | This study |
| <i>TAC1</i> InteΔM677ΔTAD              | Vector for integrating <i>TAC1</i> promoter driven <i>TAC1</i> <sup>ΔM677</sup> ΔTAD with <i>URA3</i> marker to <i>LEU2</i> locus                           | ZL536/ZL537<br>ZL538/ZL539                           | This study |
| <i>TAC1</i> InteR693KΔTAD              | Vector for integrating <i>TAC1</i> promoter driven <i>TAC1</i> <sup>R693K</sup> ΔTAD with <i>URA3</i> marker to <i>LEU2</i> locus                           | ZL536/ZL537<br>ZL538/ZL539                           | This study |
| <i>TAC1</i> InteA736VΔTAD              | Vector for integrating <i>TAC1</i> promoter driven <i>TAC1</i> <sup>A736V</sup> ΔTAD with <i>URA3</i> marker to <i>LEU2</i> locus                           | ZL536/ZL537<br>ZL538/ZL539                           | This study |
| <i>pSFS2-MED3KO</i> <sup>#b</sup>      | <i>SAT1</i> flipper construct for deleting <i>C. albicans</i> <b>MED3</b> ORF                                                                               | AZ146/Kpp063<br>Kpp062/AZ147'<br><b>ZL257/AZ147'</b> | This study |
| <i>pSFS2-SSN3KO</i> <sup>#b</sup>      | <i>SAT1</i> flipper construct for deleting <i>C. albicans</i> <b>SSN3</b> ORF                                                                               | AZ357/Kpp063<br>Kpp062/AZ358<br><b>ZL177/ZL178</b>   | This study |
| <i>pSFS2-MED15KO</i> <sup>b</sup>      | <i>SAT1</i> flipper construct for deleting <i>C. albicans</i> <b>MED15</b> ORF                                                                              | ZL082/Kpp063<br>Kpp062/ZL074<br><b>ZL085/ZL086</b>   | This study |
| <i>pSFS2-CDR2KO</i> <sup>b</sup>       | <i>SAT1</i> flipper construct for deleting <i>C. albicans</i> <b>CDR2</b> ORF                                                                               | ZL528/Kpp063<br>Kpp062/ZL808<br><b>ZL542/ZL543</b>   | This study |
| <i>pSFS2-SNF2KO</i> <sup>#b</sup>      | <i>SAT1</i> flipper construct for deleting <i>C. albicans</i> <b>SNF2</b> ORF                                                                               | ZL593/Kpp063                                         | This study |



|                                           |                                                                                                                                                                                                  |                                                                 |            |
|-------------------------------------------|--------------------------------------------------------------------------------------------------------------------------------------------------------------------------------------------------|-----------------------------------------------------------------|------------|
|                                           |                                                                                                                                                                                                  | <i>Kpp062/ZL594</i><br><b>ZL621/ZL622</b><br><b>ZL623/ZL594</b> |            |
| <i>pSFS2-CDRIKO<sup>c</sup></i>           | <i>SAT1</i> flipper construct for deleting <i>C. albicans</i> <b>CDR1</b> ORF                                                                                                                    |                                                                 | This study |
| Clp-LexA                                  | Vector for expressing <b>LexA</b> protein in <i>C. albicans</i> <i>LacZ</i> reporter strains cRC106 and yLM587; targeting <i>RPS10</i> locus with <i>URA3</i> marker                             | ZL174/ZL093<br>ZL094/ZL173                                      | (9)        |
| Clp-LexA-Tac1 <sup>130-981</sup> WT       | Vector for expressing <b>LexA-Tac1<sup>130-981</sup>WT</b> protein in <i>C. albicans</i> <i>LacZ</i> reporter strains cRC106 and yLM587; targeting <i>RPS10</i> locus with <i>URA3</i> marker    | ZL174/ZL093<br>ZL094/ZL485                                      | This study |
| Clp-LexA-Tac1 <sup>130-981</sup> T225A    | Vector for expressing <b>LexA-Tac1<sup>130-981</sup>T225A</b> protein in <i>C. albicans</i> <i>LacZ</i> reporter strain cRC106; targeting <i>RPS10</i> locus with <i>URA3</i> marker             | ZL174/ZL093<br>ZL094/ZL485                                      | This study |
| Clp-LexA-Tac1 <sup>130-981</sup> E461K    | Vector for expressing <b>LexA-Tac1<sup>130-981</sup>E461K</b> protein in <i>C. albicans</i> <i>LacZ</i> reporter strain cRC106; targeting <i>RPS10</i> locus with <i>URA3</i> marker             | ZL174/ZL093<br>ZL094/ZL485                                      | This study |
| Clp-LexA-Tac1 <sup>130-981</sup> ΔM677    | Vector for expressing <b>LexA-Tac1<sup>130-981</sup>ΔM677</b> protein in <i>C. albicans</i> <i>LacZ</i> reporter strain cRC106; targeting <i>RPS10</i> locus with <i>URA3</i> marker             | ZL174/ZL093<br>ZL094/ZL485                                      | This study |
| Clp-LexA-Tac1 <sup>130-981</sup> A736V    | Vector for expressing <b>LexA-Tac1<sup>130-981</sup>A736V</b> protein in <i>C. albicans</i> <i>LacZ</i> reporter strains cRC106 and yLM587; targeting <i>RPS10</i> locus with <i>URA3</i> marker | ZL174/ZL093<br>ZL094/ZL485                                      | This study |
| Clp-LexA-Tac1 <sup>130-981</sup> N972D    | Vector for expressing <b>LexA-Tac1<sup>130-981</sup>N972D</b> protein in <i>C. albicans</i> <i>LacZ</i> reporter strain cRC106; targeting <i>RPS10</i> locus with <i>URA3</i> marker             | ZL174/ZL093<br>ZL094/ZL485                                      | This study |
| Clp-LexA-Tac1 <sup>130-981</sup> Δ962-969 | Vector for expressing <b>LexA-Tac1<sup>130-981</sup>Δ962-969</b> protein in <i>C. albicans</i> <i>LacZ</i> reporter strain cRC106; targeting <i>RPS10</i> locus with <i>URA3</i> marker          | ZL174/ZL093<br>ZL094/ZL485                                      | This study |
| Clp-LexA-Tac1 <sup>130-981</sup> N977D    | Vector for expressing <b>LexA-Tac1<sup>130-981</sup>N977D</b> protein in <i>C. albicans</i> <i>LacZ</i> reporter strains cRC106 and yLM587; targeting <i>RPS10</i> locus with <i>URA3</i> marker | ZL174/ZL093<br>ZL094/ZL485                                      | This study |
| Clp-LexA-Tac1 <sup>130-981</sup> G980E    | Vector for expressing <b>LexA-Tac1<sup>130-981</sup>G980E</b> protein in <i>C. albicans</i> <i>LacZ</i> reporter strains cRC106 and yLM587; targeting <i>RPS10</i> locus with <i>URA3</i> marker | ZL174/ZL093<br>ZL094/ZL485                                      | This study |
| Clp-LexA-Tac1 <sup>130-981</sup> G980W    | Vector for expressing <b>LexA-Tac1<sup>130-981</sup>G980W</b> protein in <i>C. albicans</i> <i>LacZ</i> reporter strain cRC106; targeting <i>RPS10</i> locus with <i>URA3</i> marker             | ZL174/ZL093<br>ZL094/ZL485                                      | This study |
| Clp-LexA-Tac1 <sup>130-931</sup> WT       | Vector for expressing <b>LexA-Tac1<sup>130-931</sup>WT</b> protein in <i>C. albicans</i> <i>LacZ</i> reporter strain cRC106; targeting <i>RPS10</i> locus with <i>URA3</i> marker                | ZL174/ZL093<br>ZL094/ZL485                                      | This study |
| Clp-LexA-Tac1 <sup>856-981</sup> WT       | Vector for expressing <b>LexA-Tac1<sup>856-981</sup>WT</b> protein in <i>C. albicans</i> <i>LacZ</i> reporter strains cRC106 and yLM587; targeting <i>RPS10</i> locus with <i>URA3</i> marker    | ZL174/ZL093<br>ZL094/ZL485                                      | This study |
| Clp-LexA-Tac1 <sup>932-981</sup> WT       | Vector for expressing <b>LexA-Tac1<sup>932-981</sup>WT</b> protein in <i>C.</i>                                                                                                                  | ZL174/ZL093                                                     | This study |

|                                              |                                                                                                                                                                                  |                            |            |
|----------------------------------------------|----------------------------------------------------------------------------------------------------------------------------------------------------------------------------------|----------------------------|------------|
|                                              | <i>albicans</i> LacZ reporter strains cRC106 and yLM587; targeting <i>RPS10</i> locus with <i>URA3</i> marker                                                                    | ZL094/ZL560                |            |
| Cip-LexA-Tac1 <sup>856-981</sup><br>N972D    | Vector for expressing <b>LexA-Tac1<sup>856-981</sup>N972D</b> protein in <i>C. albicans</i> LacZ reporter strain cRC106; targeting <i>RPS10</i> locus with <i>URA3</i> marker    | ZL174/ZL093<br>ZL094/ZL485 | This study |
| Cip-LexA-Tac1 <sup>856-981</sup><br>Δ962-969 | Vector for expressing <b>LexA-Tac1<sup>856-981</sup>Δ962-969</b> protein in <i>C. albicans</i> LacZ reporter strain cRC106; targeting <i>RPS10</i> locus with <i>URA3</i> marker | ZL174/ZL093<br>ZL094/ZL485 | This study |
| Cip-LexA-Tac1 <sup>856-981</sup><br>N977D    | Vector for expressing <b>LexA-Tac1<sup>856-981</sup>N977D</b> protein in <i>C. albicans</i> LacZ reporter strain cRC106; targeting <i>RPS10</i> locus with <i>URA3</i> marker    | ZL174/ZL093<br>ZL094/ZL485 | This study |
| Cip-LexA-Tac1 <sup>856-981</sup><br>G980E    | Vector for expressing <b>LexA-Tac1<sup>856-981</sup>G980E</b> protein in <i>C. albicans</i> LacZ reporter strain cRC106; targeting <i>RPS10</i> locus with <i>URA3</i> marker    | ZL174/ZL093<br>ZL094/ZL485 | This study |
| Cip-LexA-Tac1 <sup>856-981</sup><br>G980W    | Vector for expressing <b>LexA-Tac1<sup>856-981</sup>G980W</b> protein in <i>C. albicans</i> LacZ reporter strain cRC106; targeting <i>RPS10</i> locus with <i>URA3</i> marker    | ZL174/ZL093<br>ZL094/ZL485 | This study |
| pV1093                                       | A tool plasmid for <i>C. albicans</i> CRISPR-Cas9 system                                                                                                                         |                            | (12)       |

<sup>a</sup> Before transformation into *C. albicans*, vectors for introducing native or tagged *TAC1* variants (the ‘*TAC1*Inte’ plasmids) were linearized by **Sall**; vectors for expressing LexA fusion proteins (the ‘Cip-LexA’ plasmids) were linearized by **StuI**; *SAT1* flipper cassettes for gene disruption were released from the ‘*pSFS2*’ constructs by **SacI/ApaI** digestion.

<sup>b</sup> When a *pSFS2* construct was used for a conventional two-round gene knock-out, positive PCR amplification by primer pairs in *italics* confirmed its correct integration at one of the two gene loci. Disruption of the remaining allele was identified by loss of specific amplification products by the primer pair(s) in **Bold** in genotyping PCR tests.

<sup>c</sup> Use of *pSFS2-CDRIKO* plasmid as a repairing template in a transient CRISPR-Cas9 system (11) to delete *CDRI* was described in **Supplemental Methods** session in detail.

<sup>#</sup> These DNA constructs are also used in a parallel study.

**Table S6 Primers used in this study**

| <b>Primer name</b> | <b>Primer sequence</b>             | <b>Note <sup>a</sup></b> |
|--------------------|------------------------------------|--------------------------|
| AZ146              | TGACGAACTTGTTTCCAAAC               |                          |
| AZ147'             | TGGATAAGTGTGATCTATCG               |                          |
| Kpp062             | GTAATGGTACAGATGGTACTAGAC           |                          |
| Kpp063             | CACAGGATGACGCCTAAC                 |                          |
| LM065              | GAGAAGAGCTCACTGTCATTATTAGGGAGAG    | SacI                     |
| LM066              | GAGAACCGCGGTTGTGGTTTTGTATATCTTTGT  | SacII                    |
| LM067              | GAGAACTCGAGGGACATAGTTCCTACTGTAC    | XhoI                     |
| LM068              | GAGAAGGGCCCTTTCTAATTGATGTCGTTTGTC  | Apal                     |
| LM069              | GAGAAGAGCTCCTCAAAGTCAAACACAATCTTT  | SacI                     |
| LM070              | GAGAACCGCGGCTAAATGAAGCTGAACTATAACT | SacII                    |
| LM071              | GAGAACTCGAGTGGTAGATAGATATAGATGTCA  | XhoI                     |
| LM072              | GAGAAGGGCCCTCATAACGATACAATTTGGTGC  | Apal                     |
| LM073              | GAGAAGAGCTCCCACAATACAACCCTACC      | SacI                     |
| LM074              | GAGAACCGCGGAATAGGCAATCCGGACAC      | SacII                    |
| LM075              | GAGAACTCGAGAGCTGACTTTTAGTAATC      | XhoI                     |
| LM076              | GAGAAGGGCCCTAACGTTTGATATGTGCC      | Apal                     |
| AZ357              | CAGGAGATAACAATAAGTTTGAG            |                          |
| AZ358              | CAAGTCCTGAACTCATTGATTTTAACC        |                          |
| ZL082<br>(TRR05)   | GACAATCAAAATTTCTCATATCAAC          |                          |
| ZL074<br>(TRR06)   | GGAGGTTATGGTTGTTC                  |                          |
| ZL085              | TTACTGTTGTTGTGGTACTAG              |                          |
| ZL086              | TCCATGGTATGCACTTGC                 |                          |
| ZL177              | GGCCATCAATTGCTGCAACAAC             |                          |
| ZL178              | TATTCTCCTCTTGAATGTACAGC            |                          |
| ZL804              | AATAAgagctcAAAGTTACTCACATCATAAGCTG | SacI                     |
| ZL805              | TGCGAccgeggCGTGTTCAGTACTCATATG     | SacII                    |
| ZL806              | CTGGTctcgagGAGTTCCAAAAGGTAATAGAG   | XhoI                     |
| ZL807              | ATGAGgggcccGGTGCTACCAATGTCCCACAC   | Apal                     |
| ZL808              | TCCTTTGTCTTTAAGAGCAGCC             |                          |
| ZL536              | ATGGTCCAAAAGGTATTGGTGCC            |                          |
| ZL537              | Cttaactatgcggcatcagagc             |                          |
| ZL538              | Gccctggactacattttgtctc             |                          |
| ZL539              | Cagctgtttctatcacggttcg             |                          |
| ZL540              | ATTCTAAGATGTCGTCGCAAGATG           | (13)                     |
| ZL541              | AGTTCTGGCTAAATCTGAATGTTTTTC        | (13)                     |
| ZL542              | TAGTCCATTCAACGGCAACATT             | (13)                     |
| ZL543              | CACCCAGTATTTGGCATTGAAA             | (13)                     |

|       |                                                                                                |           |
|-------|------------------------------------------------------------------------------------------------|-----------|
| ZL712 | TGGTGATGGTGTTACTCACG                                                                           | (14)      |
| ZL713 | GACAATTTCTCTTTCAGCAC                                                                           | (14)      |
| ZL544 | AACTCAACAACCTATCC                                                                              |           |
| ZL545 | GAGGCACTAATGTAATCC                                                                             |           |
| LM077 | gcaaggatccaagaagaagtgataatgtgattaac                                                            | BamHI (1) |
| LM078 | gcaactcgagagtattctgttgggaaaggggtgag                                                            | XhoI (1)  |
| LM085 | attagattcgcccaaaaattggtcttcataga                                                               |           |
| LM086 | tctatgaagaccaatgttggcgaaatctaat                                                                |           |
| ZL558 | ATTTACAGCCGAATTATCAATCAAATAGTC                                                                 |           |
| ZL559 | GACTATTTGATTGATAATTCGGCTGTAAATTTACCCAATTTTTTCT<br>TTGACAATAATTTG                               |           |
| ZL560 | CCAATTTTTTCTTTGACgATAATTTGGGGATTAA                                                             |           |
| ZL561 | TTAAATCCCCAAATTATcGTCAAAGAAAAAATTGG                                                            |           |
| ZL564 | GATTATTAATCGATATCCATTAATTGCTACCGAAGATTCC                                                       |           |
| ZL565 | GGAATCTTCGGTAGCAATTAATGGATATCGATTAATAATC                                                       |           |
| ZL572 | CAATTTAATAATTTACCCgatTTTTTCTTTGACAATAATTTG                                                     |           |
| ZL573 | CAAATTATTGTCAAAGAAAAatcGGGTAAATTATTAAATTG                                                      |           |
| ZL612 | CGAGTAATAAAATTTAaAAATCTTTCATTGGAT                                                              |           |
| ZL613 | ATCCAATGAAAGATTTtTAAATTTTATTACTCG                                                              |           |
| ZL552 | AATATCATTCTTACGGTGATCTTTTATTGGTTAGCTAGAGTTCCAA<br>AGGGTAACAGAGAGAAAAAATAAGAAAggtcgacggatcccc   |           |
| ZL553 | CAATAGTCTAAAAACGTCTATTATATTTTAGACGTTTGAGATACC<br>ACCATGTCAAAAAACAACTGTTTAAAtcgatgaattcgagctcg  |           |
| ZL554 | ATGTACAGATGTAATCCATTAC                                                                         |           |
| ZL555 | CACATGACCACTAACCACCACG                                                                         |           |
| ZL636 | AGCTGGTACCCGTGGTGGTGGTGGTGGTGCATTATTTATGAGAGA<br>AGGAGAAAGGC                                   | KpnI      |
| ZL637 | tGTCCATacctccCTGcggggaCTTGTCATCGTC                                                             |           |
| ZL638 | cgcCAGggaggtATGGACACTTCACTGTCCTGGGA                                                            |           |
| ZL639 | TAATggatccAGTCTAATATTTCTTTTGGAC                                                                | BamHI     |
| ZL640 | GCTGGTACCCGTGGTGGTGGTGGTGGTGCATTTTGAATGATTATA<br>TTTTTTTAAATTAATATCG                           | KpnI      |
| ZL696 | GAGTGGCATGTGATAGTTaTCGGAGAAAGAAAATTAAATGC                                                      |           |
| ZL697 | GCATTTAATTTTCTTTCTCCGAtAACTATCACATGCCACTC                                                      |           |
| ZL706 | tggtgattctttgaattttacg                                                                         |           |
| ZL707 | cgtaaaaattcaaagaatcaccaAATGACAACAAATCAAGTG                                                     |           |
| ZL708 | CATCggatccACCAATTACAACCTTTTTTTAACCC                                                            | BamHI     |
| ZL648 | AACGTTCTACAGCTTGGGTTCAAGTATTCAATGAAATCGAAGAA<br>TGCTTGGATTGGTCGATCCAAAATTTGTAggtcgacggatcccc   |           |
| ZL649 | GAACAGTGATGTACAGTGGTTATATTTATACCTGAATGTTATAAT<br>ACTTTTCGTTAAATACTTGTACATATAtcgatgaattcgagctcg |           |
| ZL650 | AACCTCTAATATGTTGGACG                                                                           |           |
| ZL651 | GAGAGATGAAAAGTATTACCG                                                                          |           |

|        |                                                                                                |                            |
|--------|------------------------------------------------------------------------------------------------|----------------------------|
| LM023  | TGAAAATAACTGCTGGTGGTCAAAAAAGTTTGCATCCAAATCAA<br>GTATTGAAATTTATGTGTCAAGGACAGATAggtcgacggatccccg |                            |
| LM014  | AACACACAGTAATATTACATAAACCACCATCTTGTCTTCTTCTA<br>CTTCATCCCCCCTCTCCTAAAAATtcgatgaattcgagctcgt    |                            |
| KPP017 | AAGGATAAAGAATTTGAACG                                                                           |                            |
| KPP018 | TATATAGATCAGAAACAACA                                                                           |                            |
| LM21   | CTAATTAACGTGTGTGTATGGATC                                                                       |                            |
| ZL514  | ATTGACGACGATGATGAC                                                                             | 1-up <sup>F</sup>          |
| ZL515  | ATAAGAAGTTGAGGCGAAG                                                                            | 1-up <sup>R</sup>          |
| ZL849  | ATCCTCGTTACTCAATAAG                                                                            | 1-1 <sup>F</sup>           |
| ZL850  | AGACACTAACTCCGTATT                                                                             | 1-1 <sup>R</sup>           |
| ZL851  | TGCGTGACCCAAACATAATCT                                                                          | 1-2 <sup>F</sup>           |
| ZL852  | TGTGACGAGGTGGCTGAT                                                                             | 1-2 <sup>R</sup>           |
| ZL853  | GTAAGAGGAGTAGCAAGTG                                                                            | 1-3 <sup>F</sup>           |
| ZL854  | TTAAGCGATTCTGGTAGTTAT                                                                          | 1-3 <sup>R</sup>           |
| ZL518  | ttcaacatattagaatcgaatcattacg                                                                   | 1-DRE <sup>F</sup><br>(15) |
| ZL519  | gcggtgtgtgtttgtgtg                                                                             | 1-DRE <sup>R</sup><br>(15) |
| ZL528  | CATCTTGCGGTTCTAATAG                                                                            | 2-up <sup>F</sup>          |
| ZL529  | CACTCTAATCTGATATGGTTC                                                                          | 2-up <sup>R</sup>          |
| ZL855  | TCAACTGTAAAGTCCGATAA                                                                           | 2-1 <sup>F</sup>           |
| ZL856  | TGTAGATTGTCTGAGTCTTG                                                                           | 2-1 <sup>R</sup>           |
| ZL857  | GACTCAGACAATCTACAA                                                                             | 2-2 <sup>F</sup>           |
| ZL858  | AGTTTGACATCCTTGAAT                                                                             | 2-2 <sup>R</sup>           |
| ZL859  | CTGATAATATACCTCTGTCGTAA                                                                        | 2-3 <sup>F</sup>           |
| ZL860  | GGTCACATCTTGCAACA                                                                              | 2-3 <sup>R</sup>           |
| ZL861  | TGTGACCAGGTAGTGATAGT                                                                           | 2-4 <sup>F</sup>           |
| ZL862  | GCATTGCTGAGAGTGGAA                                                                             | 2-4 <sup>R</sup>           |
| ZL532  | aattcaaacacaacaataaggctgt                                                                      | 2-DRE <sup>F</sup><br>(15) |
| ZL533  | gcaatcattgtggtatacatcgga                                                                       | 2-DRE <sup>R</sup><br>(15) |
| ZL488  | GGT CCA CGC GTT CCA GCA ACA TCA ACA TCG                                                        | MluI                       |
| ZL489  | GGT CCA CGC GTT GGT GGT TGT GGT AGC AGG AAC                                                    | MluI                       |
| ZL490  | GAA GCT GCA GAC CAA TTA CAA CTC TTT TTT AAC CC                                                 | PstI                       |
| ZL524  | ccgcCTGCAGTTAAATCTCCAAATTATTGTC                                                                | PstI                       |
| ZL525  | ccgcCTGCAGTTAAATCCACAAATTATTGTC                                                                | PstI                       |
| ZL526  | GCGCAAAGTTCGAgTAAATCCACAAATTATTGTC                                                             | XhoI                       |
| ZL527  | ccgcCTGCAGTTAAATCCCCAAATTATcGTCAAAGAAAAAATTGG                                                  | PstI                       |
| ZL173  | Gatgaagcaactgtcaaacgc                                                                          |                            |
| ZL174  | GGAATGCTTATTTGAAAAAGACTGGC                                                                     |                            |
| ZL093  | CTCACGCACGCCATACTAC                                                                            |                            |

|                        |                                                           |                |
|------------------------|-----------------------------------------------------------|----------------|
| ZL094                  | GAGAGAACTATATTATACAC                                      |                |
| ZL485<br>(Zinc2-3224)  | ATGCTCAGTCACCAAGTTA                                       | (1)            |
| ZL691                  | ACTAATAAGGAACTTTGCGG                                      |                |
| ZL692                  | CGGCATCAAACCGAATTGG                                       |                |
| ZL693                  | ATTCACAACACCTGGCTG                                        |                |
| ZL481<br>(Zinc2-1123)  | GATGCCAACGAATTATTGA                                       | (1)            |
| ZL486<br>(Zinc2-1798c) | ACA TCA ACA ATG CTT CTA C                                 | (1)            |
| ZL670                  | CCAAActcgagTTATTTGGACGTGAATTCCGC                          | XhoI           |
| ZL671                  | gggtggatccTTCGGAGCTCAATTTGCGTTTAGCCgaag                   | BamHI/<br>SacI |
| ZL672                  | AGCTGGTACCCGTGGTGGTGGTGGTGGTgcattttaataaattagattaataattcg | KpnI           |
| ZL673                  | ttgacatacctccCTGcggtgaCTTGTCATCGTC                        |                |
| ZL674                  | ccgCAGggaggtatgcaattgccaccacc                             |                |
| ZL690                  | gttgatgaattctatcgacc                                      |                |
| ZL556                  | ggtccacgcgttGGTGGAGGTCCAGGTGGAGATCTAGAATCGAGATTGA<br>GTCG | MluI           |
| ZL557                  | gcGAATTGGGTggCGcGCCCCCCTCGA                               | AscI           |
| ZL185                  | TCCATTACCTGAACACTT                                        |                |
| ZL630                  | TGTTGGCGCGCCteaTGAACGACCTGTGCTTTC                         | AscI           |
| ZL550                  | TGTTGGTAGAGTGACTTATC                                      |                |
| ZL551                  | TGTTATTGGAAGATGATGATTG                                    |                |
| ZL578                  | CAGTGTTATCAGTGAAGG                                        |                |
| ZL579                  | TGCTCTATGAAGACCAAT                                        |                |
| ZL386                  | CGGTAAGGTTACTGGTAAG                                       |                |
| ZL387                  | AATGGCAATCTCAATGGT                                        |                |
| ZL907                  | gtGGGAGCTCAACGGAAAATTGC                                   | SacI           |
| ZL908                  | TAAAAccgcggATATCTTAAAGGGTAGATCTCAAC                       | SacII          |
| ZL909                  | ATAActcgagCAGTTTGTTTTTTTGACATGGTGG                        | XhoI           |
| ZL910                  | GTATgggcccTTGCAACGGAAGAGTCGG                              | ApaI           |
| ZL911                  | GGGGTAGGGATCGGATAGT                                       |                |
| ZL912                  | ACAGATGAGAAACACTTTTTTCC                                   |                |
| ZL914<br>(CaCas9/for)  | ATCTCATTAGATTTGGAACTTGTGGGTT                              | (11)           |
| ZL915<br>(CaCas9/rev)  | TTCGAGCGTCCCAAACCTTCT                                     | (11)           |
| ZL916<br>(SNR52/F)     | AAGAAAGAAAGAAAACCAGGAGTGAA                                | (11)           |
| ZL917<br>(sgRNA/R)     | ACAAATATTTAAACTCGGGACCTGG                                 | (11)           |
| ZL918                  | GCGGCCGCAAGTGATTAGACT                                     | (11)           |

|                    |                                                      |      |
|--------------------|------------------------------------------------------|------|
| (SNR52/N)          |                                                      |      |
| ZL919<br>(sgRNA/N) | GCAGCTCAGTGATTAAGAGTAAAGATGG                         | (11) |
| ZL926              | ATACAAGTGAAAACATTCAGCAAATTAATAATAGTTTACGCAA<br>GTC   |      |
| ZL927              | CTGAATGTTTTCACTTGTATGTTTTAGAGCTAGAAATAGCAAGT<br>TAAA |      |
| ZL654              | GTGCTGAACGTGAATATG                                   |      |
| ZL257              | gttgggatccgtGTTGAAGGGCCACCTCCAAG                     |      |

<sup>a</sup> The 'Note' column denotes the restriction enzyme cutting site(s) added for cloning or the annealing region of a ChIP assay primer (referring to **Fig. 3A**).

## Supplemental Methods

### Construction of vectors for expression of Tac1 variants from *LEU2* locus

Gain-of-function point mutations were individually introduced into pDS1097 (1) to generate the corresponding '*TAC1Inte*' plasmids listed in **Table S5**. In details, PCR amplicons of ZL481/LM086, ZL481/ZL565, ZL481/ZL573, ZL481/ZL561, ZL481/ZL558 and ZL481/ZL613 from pDS1097, were respectively fused to amplicons of LM085/LM078, ZL564/LM078, ZL572/LM078, ZL560/LM078, ZL559/LM078 and ZL612/LM078 by fusion PCR. The resulting DNA fragments were digested by PstI and XhoI and ligated to pDS1097 vector cut by the same enzymes to generate *TAC1Inte-E461K*, *-ΔM677*, *-N972D*, *-N977D*, *-Δ962-969* and *-R693K*, respectively. *TAC1Inte-G980W* was constructed by ligating PstI/XhoI digested ZL481/ZL526 amplicon from pDS1097 to pDS1097 vector digested by the same enzymes.

### Construction of vectors for expression of 6His3Flag tagged Tac1 variants from *LEU2* locus

6His3Flag tag coding sequence was first introduced to the 5' end of wild type *TAC1* ORF on pDS1097. Specifically, pDS1097 was used as the template and LM077/ZL636 as the primer pair, *TAC1* promoter (including the translation start codon) was amplified with 6His coding sequence added at 3' end. This fragment was digested by BamHI/KpnI and ligated to *pFA-6HIS3FLAG-SAT1* (6) vector digested by the same enzymes. LM077/ZL637 amplicon from the resulting plasmid, which contains *TAC1* promoter driven entire *6HIS3FLAG* tag was fused to Tac1 (aa1-433) coding sequence amplified from pDS1097 by ZL638/ZL486 through fusion PCR. The product was digested by BamHI/PstI and ligated to pDS1097 cut at the same sites to generate *TAC1InteHF-WT*. After confirmed by DNA sequencing, the BamHI/PstI fragment was re-cleaved from *TAC1InteHF-WT* and sub-cloned into *TAC1Inte-E461K*, *-ΔM677*, *-N972D*, *-N977D*, *-Δ962-969* and *-R693K* between the



same sites, resulting in each corresponding ‘*TAC1InteHF*’ plasmid. To introduce C43Y mutation to Tac1 DNA binding domain, fusion PCR product sealing the amplicon of LM077/ZL697 and amplicon of ZL696/ZL486 both from *TAC1InteHF-WT*, was digested by BamHI/PstI and ligated to *TAC1InteHF-WT* and *TAC1InteHF-R693K* cut by the same enzymes. *TAC1InteHF-TAC1 $\Delta$ TAD* was derived from *TAC1InteHF-TAC1* by replacing the sequence between the PstI and XhoI sites by a ZL481/ZL670 amplicon digested by the same enzymes. The same method was used to generate the plasmids for expression of 6His3Flag tagged Tac1<sup>GOF</sup> TAD truncation mutants (*TAC1InteHF-E461K $\Delta$ TAD*, *- $\Delta$ M677 $\Delta$ TAD*, *-R693K $\Delta$ TAD* and *-A736V $\Delta$ TAD*) and their untagged forms (*TAC1InteE461K $\Delta$ TAD*,  *$\Delta$ M677 $\Delta$ TAD*, *R693K $\Delta$ TAD* and *A736V $\Delta$ TAD*) from the corresponding ‘*TAC1InteHF*’ and ‘*TAC1Inte*’ constructs.

### **Construction of SAT1 flipper vectors for gene disruption**

To generate SAT1 flipper (16) constructs for deleting *MED3*, *SSN3*, *MED15*, *CDR2*, *SNF2* and *CDR1* in *C. albicans*, 5’ homologous regions (5’ HRs) for each gene were respectively amplified by LM065/LM066, LM069/LM070, LM073/LM074, ZL804/ZL805, ZL589/ZL590 and ZL907/ZL908 from genomic DNA and 3’ HRs respectively by LM067/LM068, LM071/LM072, LM075/LM076, ZL806/ZL807, ZL591/ZL592 and ZL909/ZL910. pSFS2 vectors with individual 5’ HR inserted between the SacI/SacII sites and the corresponding 3’ HR inserted between the XhoI/ApaI sites were named as *pSFS2-MED3KO*, *pSFS2-SSN3KO*, *pSFS2-MED15KO*, *pSFS2-CDR2KO*, *pSFS2-SNF2KO* and *pSFS2-CDR1KO* according to their gene targets.

### **Construction of vectors for over-expression of 6His3Flag tagged Tac1 variants**

Using *C. albicans* genomic DNA as template and ZL639/ZL640 as primers, *ACT1* promoter (including the translation start codon) was amplified with 6His coding sequence added at its 3’ end. This fragment was digested by BamHI/KpnI and

inserted into *pFA-6HIS3FLAG-SAT1* between the two sites. ZL639/ZL637 amplicon from the resulting plasmid, which contains *ACT1* promoter driven complete 6His3Flag tag sequence, after fused to Tac1 (aa1-433) coding sequence amplified from pDS1097 by ZL638/ZL486, was digested by BamHI/PstI and ligated to pDS1097 cut at the same sites to generate *TAC1InteHF-WT<sub>OE</sub>*. The BamHI/PstI insertion, after confirmed by DNA sequencing, was also sub-cloned into *TAC1InteHF-R693K* and *TAC1InteHF-N972D* to generate the corresponding over-expression vector *TAC1InteHF-R693K<sub>OE</sub>* and *TAC1InteHF-N972D<sub>OE</sub>*.

### **Construction of vectors for expression of LexA fused Tac1 fragments in *LacZ* reporter strains**

DNA fragments encoding Tac1 TAD (aa856-981) variants (wild type, *N972D*, *Δ962-969*, *N977D*, *G980E* and *G980W*) were amplified respectively by ZL489/ZL490 from pDS1097, ZL489/ZL490 from *TAC1Inte-N972D*, ZL489/ZL490 from *TAC1Inte-Δ962-969*, ZL489/ZL527 from pDS1097, ZL489/ZL524 from pDS1097 and ZL489/ZL525 from pDS1097, digested by MluI/PstI and inserted into Cip-LexA (9) vector between the same sites. The shorter form of wild type Tac1 TAD (aa932-981) coding sequence amplified by ZL488 and ZL490 from pDS1097 was introduced into Cip-LexA in the same way.

Vectors expressing LexA-Tac1(aa130-981) variants (Cip-LexA-Tac<sup>130-981</sup>WT, -255A, -E461K, -ΔM677, -A736V, -N972D, -Δ962-969, -N977D, -G980E and -G980W) were constructed by inserting MluI/AscI digested ZL556/ZL557 amplicon respectively from pDS1097, ACY67, *TAC1Inte-E461K*, *TAC1Inte-ΔM677*, pAC97, *TAC1Inte-N972D*, *TAC1Inte-Δ962-969*, *TAC1Inte-N977D*, pAC157 and *TAC1Inte-G980W* into MluI linearized Cip-LexA vector. Correctly oriented insertion was selected by positive amplification of ZL185/ZL486 and negative amplification of ZL185/ZL485. In addition, ZL556/ZL630 amplicon from pDS1097 was inserted into Cip-LexA in the same way to generate Cip-LexA-Tac1<sup>130-931</sup>WT.

### **Deletion of *cdr1* by a transient CRISPR-Cas9 system**

Deletion of *cdr1* was performed using the system and protocol described in (11) with modifications. A Cas9 cassette was amplified by ZL914/ZL915 from pV1093 (12). A sgRNA cassette was generated by a nest fusion PCR (11), where ZL918/ZL919 was used to seal the two fragments amplified from pV1093 by ZL916/ZL926 and ZL927/ZL917. Choose of the sgRNA sequence was guided by a genome-wide search described in (12). A DNA mixture containing 800 ng of Cas9 cassette, 800 ng of sgRNA cassette and 500 ng of SacI/ApaI digested *pSFS2-CDR1KO* plasmid, which serves as a repairing template, were used to transform *C. albicans* cells by electroporation. Transformants with deletions in both copies of *CDR1* were identified by loss of the ZL540/ZL541 and ZL654/ZL912 amplicons during PCR testing.

## References

1. **Coste AT, Karababa M, Ischer F, Bille J, Sanglard D.** 2004. TAC1, transcriptional activator of CDR genes, is a new transcription factor involved in the regulation of *Candida albicans* ABC transporters CDR1 and CDR2. *Eukaryot Cell* **3**:1639-1652.
2. **Coste A, Turner V, Ischer F, Morschhauser J, Forche A, Selmecki A, Berman J, Bille J, Sanglard D.** 2006. A mutation in Tac1p, a transcription factor regulating CDR1 and CDR2, is coupled with loss of heterozygosity at chromosome 5 to mediate antifungal resistance in *Candida albicans*. *Genetics* **172**:2139-2156.
3. **Coste A, Selmecki A, Forche A, Diogo D, Bougnoux ME, d'Enfert C, Berman J, Sanglard D.** 2007. Genotypic evolution of azole resistance mechanisms in sequential *Candida albicans* isolates. *Eukaryot Cell* **6**:1889-1904.
4. **Noble SM, Johnson AD.** 2005. Strains and strategies for large-scale gene deletion studies of the diploid human fungal pathogen *Candida albicans*. *Eukaryot Cell* **4**:298-309.
5. **Zhang A, Liu Z, Myers LC.** 2013. Differential regulation of white-opaque switching by individual subunits of *Candida albicans* mediator. *Eukaryot Cell* **12**:1293-1304.
6. **Zhang A, Petrov KO, Hyun ER, Liu Z, Gerber SA, Myers LC.** 2012. The Tlo proteins are stoichiometric components of *Candida albicans* mediator anchored via the Med3 subunit. *Eukaryot Cell* **11**:874-884.
7. **Morschhauser J, Barker KS, Liu TT, Bla BWJ, Homayouni R, Rogers PD.** 2007. The transcription factor Mrr1p controls expression of the MDR1 efflux pump and mediates multidrug resistance in *Candida albicans*. *PLoS Pathog* **3**:e164.
8. **Lindsay AK, Morales DK, Liu Z, Grahl N, Zhang A, Willger SD, Myers LC, Hogan DA.** 2014. Analysis of *Candida albicans* mutants defective in the Cdk8 module of mediator reveal links between metabolism and biofilm formation. *PLoS Genet* **10**:e1004567.
9. **Russell CL, Brown AJ.** 2005. Expression of one-hybrid fusions with *Staphylococcus aureus* lexA in *Candida albicans* confirms that Nrg1 is a transcriptional repressor and that Gcn4 is a transcriptional activator. *Fungal Genet Biol* **42**:676-683.
10. **Wilson RB, Davis D, Mitchell AP.** 1999. Rapid hypothesis testing with *Candida albicans* through gene disruption with short homology regions. *J Bacteriol* **181**:1868-1874.
11. **Min K, Ichikawa Y, Woolford CA, Mitchell AP.** 2016. *Candida albicans* Gene Deletion with a Transient CRISPR-Cas9 System. *mSphere* **1**.
12. **Vyas VK, Barrasa MI, Fink GR.** 2015. A *Candida albicans* CRISPR system permits genetic engineering of essential genes and gene families. *Sci Adv* **1**:e1500248.

13. **Liu TT, Znaidi S, Barker KS, Xu L, Homayouni R, Saidane S, Morschhauser J, Nantel A, Raymond M, Rogers PD.** 2007. Genome-wide expression and location analyses of the *Candida albicans* Tac1p regulon. *Eukaryot Cell* **6**:2122-2138.
14. **Lu Y, Su C, Liu H.** 2012. A GATA transcription factor recruits Hda1 in response to reduced Tor1 signaling to establish a hyphal chromatin state in *Candida albicans*. *PLoS Pathog* **8**:e1002663.
15. **Coste AT, Crittin J, Bauser C, Rohde B, Sanglard D.** 2009. Functional analysis of cis- and trans-acting elements of the *Candida albicans* CDR2 promoter with a novel promoter reporter system. *Eukaryot Cell* **8**:1250-1267.
16. **Reuss O, Vik A, Kolter R, Morschhauser J.** 2004. The SAT1 flipper, an optimized tool for gene disruption in *Candida albicans*. *Gene* **341**:119-127.
